1  
2  
3 **Distinct dystrophin and Wnt/Ror-dependent pathways establish planar-**  
4 **polarized membrane compartments in *C. elegans* muscles**  
5  
6  
7  
8

9 Alice Peysson<sup>1,\*</sup>, Noura Zariohi<sup>1,\*</sup>, Marie Gendrel<sup>2</sup>, Amandine Chambert-Loir<sup>1</sup>,  
10 Noémie Frébault<sup>1</sup>, Olga Andrini<sup>1</sup>, Thomas Boulin<sup>1,#</sup>  
11

12  
13 <sup>1</sup> Université Claude Bernard Lyon 1, CNRS UMR 5284, INSERM U1314, MeLiS,  
14 Lyon 69008, France

15 <sup>2</sup> Institut de Biologie de l'École Normale Supérieure (IBENS), École Normale  
16 Supérieure, CNRS, INSERM, Université Paris Sciences et Lettres Research  
17 University, Paris 75005, France

18 \* These authors contributed equally

19 # Lead Contact  
20

21 Correspondence: [thomas.boulin@univ-lyon1.fr](mailto:thomas.boulin@univ-lyon1.fr)  
22  
23  
24  
25  
26  
27  
28  
29  
30  
31  
32  
33

34  
35 **6 Figures, 7 Supplementary Figures**  
36  
37  
38

39 Keywords: Plasma membrane compartmentalization, planar cell polarity, ion  
40 channels, Dystrophin-associated protein complex, Wnt signaling, *C. elegans*.  
41

## 42 SUMMARY

43

44 The plasma membrane of excitable cells is highly structured and molecular scaffolds recruit  
45 proteins to specific membrane compartments. Here, we show that potassium channels and  
46 proteins belonging to the dystrophin-associated protein complex define multiple types of  
47 planar-polarized membrane compartments at the surface of *C. elegans* muscle cells.  
48 Surprisingly, conserved planar cell polarity proteins are not required for this process. However,  
49 we implicate a Wnt signaling module involving the Wnt ligand EGL-20, the Wnt receptor CAM-  
50 1, and the intracellular effector DSH-1/disheveled in the formation of this cell polarity pattern.  
51 Moreover, using time-resolved and tissue-specific protein degradation, we demonstrate that  
52 muscle cell polarity is a dynamic state, requiring continued presence of DSH-1 throughout  
53 post-embryonic life. Our results reveal the intricate, highly reproducible, and entirely  
54 unsuspected complexity of the worm's sarcolemma. This novel case of planar cell polarity in a  
55 tractable genetic model organism may provide valuable insight into the molecular and cellular  
56 mechanisms that regulate cellular organization, allowing specific functions to be  
57 compartmentalized within distinct plasma membrane domains.

58

59

## 60 INTRODUCTION

61

62 In neurons and skeletal muscle cells, molecular scaffolds concentrate ion channels in specific  
63 membrane sub compartments endowing them with specific functional properties. Distinct  
64 cellular mechanisms organize membrane domains such as the axon initial segment, nodes of  
65 Ranvier, somato-dendritic compartments and chemical synapses. Large molecular complexes  
66 centered around proteins such as ankyrin, PSD-95 or dystrophin organize membrane domains  
67 and physically anchor ion channels<sup>1-4</sup>. In addition to controlling their spatial distribution, it is  
68 essential that the proper number of ion channels are targeted to these compartments<sup>5</sup>. In  
69 epithelial cells, cortical membrane domains are organized by specialized planar cell polarity  
70 (PCP) signaling pathways<sup>6</sup>. These PCP cascades integrate extracellular directional cues  
71 provided by Wnt ligand gradients, with cell-cell contact based information exchange via  
72 membrane-bound protein complexes. This elaborate process allows distinct proteins to be  
73 localized asymmetrically within the cell, creating repetitive planar-polarized cellular structures  
74 within large cell layers.

75 The musculature of *Caenorhabditis elegans* is organized into two ventral and two dorsal  
76 quadrants that run along the length of the body. Each quadrant is composed of two bands of  
77 successive muscle cells<sup>7</sup>. Body wall muscles are diamond-shaped cells when observed in a  
78 dorso-ventral view (Figure 1A). They project membrane extensions, called "muscle arms",  
79 towards the neurites of presynaptic motoneurons to form post-synaptic domains that  
80 concentrate ligand-gated ion channels at chemical synapses. The molecular mechanisms that  
81 underlie the construction of these membrane nanodomains have been extensively  
82 characterized<sup>8</sup>. In comparison, little is known about how membrane proteins are triaged to  
83 other parts of the muscle cell. Muscle cells and sarcomeres are attached to the epidermis via  
84 a network of integrin-containing adhesive complexes that cover the outer surface of muscle  
85 cells. In addition to integrins, the Dystrophin-Associated Protein Complex (DAPC) physically  
86 connects the intracellular actin cytoskeleton to the extracellular matrix along the muscle  
87 sarcolemma<sup>7</sup> and have been shown to anchor the BK potassium channel SLO-1<sup>9,10</sup>.

88 Recent transcriptomic analyses have revealed that a surprisingly large number of ion  
89 channels genes are co-expressed in *C. elegans* muscle cells raising interesting questions

90 relating to their temporal dynamics, their subcellular distribution, possible heteromeric  
91 assemblies, and individual functions<sup>11–18</sup>. Yet, whether and how these different channels could  
92 be addressed to different parts of the muscle cell, or even organized in different submembrane  
93 compartments has rarely been addressed.

94 In this study, we reveal the highly structured organization of the plasma membrane of  
95 *C. elegans* body wall muscle cells. By investigating the subcellular localization of ion channels  
96 and members of the dystrophin-associated protein complex (DAPC), we show that different  
97 proteins partition to distinctive, highly-reproducible, asymmetric membrane compartments. In  
98 particular, we found that the potassium channels TWK-28, TWK-24, and SLO-1 occupy  
99 distinct, but partially overlapping, polarized compartments at the tip, the center and the  
100 posterior part of each muscle cell, respectively. In addition, diffraction-limited microscopy  
101 analyses suggest that DAPCs with different compositions exist within a cell, highlighting an  
102 additional not previously recognized level of molecular complexity and heterogeneity. Using a  
103 forward genetic screening approach, we show that surface expression of TWK-28 is dependent  
104 on the dystrophin complex, likely via direct recruitment, but that the dystrophin complex itself  
105 is not required for TWK-28's polarized targeting. The asymmetrical distribution of ion channels  
106 and DAPC proteins at the cellular and tissue scale is highly reminiscent of canonical planar  
107 cell polarity (PCP) patterns. Intriguingly, conserved PCP genes are not involved in this process.  
108 However, we found that disheveled/DSH-1, the Wnt receptor Ror/CAM-1, and the Wnt  
109 ligand/EGL-20 are required for the asymmetric localization of ion channels and DAPC proteins  
110 along the anteroposterior axis of muscle cells. Finally, we show that disheveled is (1)  
111 continuously required to maintain cellular polarity, and (2) that post-embryonic expression can  
112 restore defective cell polarity, demonstrating that muscle polarity is a dynamic state. Taken  
113 together, these results highlight the remarkably complex organization of the worm's  
114 sarcolemma. The asymmetric membrane compartments defined by potassium channels and  
115 DAPC proteins, repeated in each muscle cell along the length of the animal, constitute the first  
116 examples of canonical planar cell polarity patterns in *C. elegans*.

117

## 118 **RESULTS**

119

### 120 **Ion channel localization reveals a remarkably complex and planar-polarized** 121 **organization of the muscle sarcolemma**

122 Potassium-selective channels are the largest family of ion channels in the *C. elegans* genome.  
123 Transcriptomic data indicate that up to 21 distinct potassium channel subunits are co-  
124 expressed in body wall muscle cells<sup>11,17</sup>. Yet, little is known about the subcellular localization  
125 of most of these channels. To address this question, we used two previously published reporter  
126 strains (TWK-18<sup>15</sup>; SLO-1<sup>16</sup>) and engineered knockin lines for six two-pore domain (K2P)  
127 channels (TWK-8, TWK-12, TWK-24, TWK-28, TWK-42, TWK-43) using CRISPR/Cas9-based  
128 gene editing.

129 Careful analysis of these fluorescent reporters revealed a remarkable diversity of  
130 situations. While TWK-8 was present throughout the cell surface (Figure 2F), TWK-12 and  
131 TWK-43 were only visible in muscle arms and on the lateral sides of body wall muscle cells,  
132 but not on the outer surface that faces the hypodermis (Figure S1A). Conversely, TWK-18 and  
133 TWK-42 showed distinct distribution patterns on the outer face of each muscle cell, which were  
134 either broad (TWK-18) or punctate (TWK-42) (Figure 2F).

135 The localization of SLO-1, TWK-24 and TWK-28 were the most striking (Figures 1A  
136 and 1B). Indeed, TWK-28 was concentrated at the anterior tip of each muscle cell, in a singular  
137 comet-like pattern. Conversely, SLO-1 channels were only present in the posterior part of each

138 muscle cell, forming a regularly-spaced punctate pattern. Finally, while TWK-24 channels  
139 appeared to be broadly distributed at first glance, outlining muscle cells revealed that TWK-24  
140 was in fact absent from their extremities and enriched in the central portion of the cell.

141 Given that SLO-1, TWK-24, and TWK-28 domains partially overlap at the scale of a  
142 muscle cell, we wondered whether they were also colocalized in membrane nanodomains. By  
143 simultaneously labeling the three channels and using image segmentation, we observed that  
144 individual ion channel clusters were clearly separable even using diffraction-limited confocal  
145 microscopy, suggesting that they could be part of distinct protein complexes, even where their  
146 distribution patterns overlap at the cellular scale (Figure 1C).

147 The SLO-1 channel has been shown to physically interact with the integral membrane  
148 protein ISLO-1<sup>19</sup>. Therefore, we generated a fluorescent knockin line to assess its subcellular  
149 localization. Remarkably, ISLO-1 and SLO-1 did not show identical distribution patterns. While  
150 ISLO-1 colocalized with SLO-1 in the posterior part of the cell (Figure 1D), ISLO-1 was also  
151 clearly enriched at the anterior tip in a comet-like pattern that coincided perfectly with TWK-28  
152 (Figure 1E). Hence, the distribution pattern of ISLO-1 defines a fourth class of asymmetrical  
153 subcellular localization with both anterior and posterior domains, in which ISLO-1 is organized  
154 in very different subcellular patterns, i.e., a comet-shaped anterior pattern, and a punctate,  
155 regularly-spaced, posterior pattern.

156 Taken together these observations reveal the remarkably complex molecular makeup  
157 of the plasma membrane of *C. elegans* muscle cells. They demonstrate, for the first time, the  
158 existence of asymmetric membrane sub-compartments with distinct molecular compositions.  
159 Furthermore, as these asymmetric distribution patterns are repeated in each muscle cells all  
160 along the length of the worm, they also represent a quintessential case of planar cell polarity  
161 at the tissue scale, which has not been observed so far in *C. elegans*.

162

### 163 **Dystrophin and dystrophin-associated proteins are required for TWK-28 surface** 164 **expression**

165 To understand how TWK-28 is targeted to the tip of muscle cells, we performed a forward  
166 genetic screen based on the rationale that disruption of factors required to address TWK-28 to  
167 the cell surface would suppress the effect of a hyperactivating gain-of-function mutation. We  
168 previously demonstrated that the activity of vertebrate and invertebrate two-pore domain  
169 potassium channels can be tuned by mutating a single residue in the second transmembrane  
170 domain, named TM2.6<sup>20</sup>. After confirming that this mutation increased TWK-28 activity using  
171 heterologous expression in *Xenopus* oocytes (Figure S1B), we used CRISPR/Cas9 gene  
172 editing to build a *twk-28* TM2.6 gain-of-function mutant (*bln485*, TWK-28 L210T). These  
173 mutants displayed strongly reduced locomotion, as expected for a gain-of-function mutation  
174 that decreases the excitability of muscle cells (Figure S1C).

175 After screening approx. 15,000 mutagenized haploid genomes, we obtained 182  
176 independent suppressor lines that had regained near wild-type mobility. Among these, 102  
177 were extragenic revertants based on genetic segregation, i.e., mutants that did not alter the  
178 *twk-28* gene sequence. Using whole genome resequencing, we analyzed 25 of these mutants  
179 and found that 14 were loss-of-function alleles of *dys-1*, the *C. elegans* ortholog of dystrophin,  
180 and that one was an allele of *islo-1* (Figure S1D).

181 To measure their impact on TWK-28 surface expression, we combined *dys-1* and *islo-*  
182 *1* mutants with the fluorescently-labeled TWK-28 reporter (Figures 2A and 2B). We observed  
183 a drastic change in *dys-1*(*bln582*) and *islo-1*(*bln549*) mutants as the TWK-28 fluorescence was  
184 reduced by 74% and 70% relative to wild type, respectively. Interestingly, *dys-1*(*bln582*)  
185 harbors an early stop codon at W110. This mutation affects only the longest dystrophin isoform



186 that contains both calponin-homology actin-binding domains. To verify whether the remaining  
187 TWK-28 fluorescence could be due to residual activity of shorter dystrophin isoforms, we  
188 generated *syb2174*, a molecular null allele that deletes the entire 31 kb-long *dys-1* genomic  
189 locus. This allele showed the same effect as *bln582*, arguing that the W110Stop mutation is a  
190 functional null allele for TWK-28 localization (Figures 2A).

191 In addition to dystrophin, *C. elegans* muscle express the orthologs of the dystrophin-  
192 associated proteins dystrobrevin (*dyb-1*), syntrophin (*stn-1*, *stn-2*), and sarcoglycan/Sgc (*sgca-*  
193 *1*, *sgcb-1*, *sgn-1*). To determine the contribution of these proteins to the surface expression of  
194 TWK-28, we first tested sarcoglycan mutants. Loss of individual sarcoglycans or of three Sgc  
195 genes at once did not significantly modify TWK-28 fluorescence levels (Figures S1E and S1F).  
196 Next, we measured the impact of *dyb-1*, *stn-1*, and *stn-2* mutants (Figures 2B and 2D). *dyb-*  
197 *1(cx36)*, *stn-1(ok292)* and *stn-2(ok2417)* each significantly reduced TWK-28 fluorescence, by  
198 approx. 55%, 37%, and 76%, respectively, suggesting a predominant requirement of STN-2.  
199 In all cases, residual TWK-28 channels were still restricted to the anterior tip of muscle cells,  
200 indicating that targeting of TWK-28 to the comet-like domain is not solely dependent on DAPC  
201 proteins.

202 To assess whether the DAPC was more broadly required for the localization of muscle-  
203 expressed K2P channels, we combined four fluorescent knockin lines with a *dys-1* loss-of-  
204 function allele. We observed no obvious impact for any of these channels, whether they were  
205 uniformly distributed (TWK-8, TWK-18, TWK-42), or asymmetrically localized (TWK-24)  
206 (Figure 2F).

207 Taken together, these results suggested a model in which TWK-28 could be stabilized  
208 at the sarcolemma via interactions with the DAPC, as is the case for voltage-gated sodium  
209 channels and inwardly-rectifying potassium channels in vertebrate cardiomyocytes<sup>3,4</sup>. Indeed,  
210 a short amino acid sequence in the cytoplasmic C-terminus of Nav1.5 and Kir4.1 is recognized  
211 by the PDZ domain of syntrophin, which itself binds to dystrophin and thus stabilizes these ion  
212 channels at the plasma membrane. Using *in silico* prediction algorithms<sup>21</sup>, we identified a  
213 putative PDZ-binding sequence in the carboxy-terminus of TWK-28 (Figure 2C). After inserting  
214 a premature stop codon that removed these amino acids by gene editing (Figure 2C) in the  
215 context of the TWK-28 fluorescent reporter strain, we observed a dramatic reduction in the  
216 number of TWK-28 channels (approx. 80%) at the cell surface, similar to *dys-1* and *stn-2*  
217 mutants (Figures 2D and 2E). Combining this truncated TWK-28 channel with a molecular null  
218 allele of *dys-1* did not further reduce TWK-28-associated fluorescence (Figure 2E), which is  
219 consistent with a model in which TWK-28 is directly recognized by syntrophins and stabilized  
220 at the plasma membrane by the dystrophin-associated protein complex.

221

### 222 **TWK-28 dynamics following post-embryonic DYS-1 degradation and recovery**

223 To examine the dynamics of the relationship between TWK-28 and the DAPC, we developed  
224 a temporally-controlled dystrophin degradation strategy using the auxin-inducible degron (AID)  
225 system<sup>22</sup>. To monitor DYS-1 levels and subcellular localization, we associated an  
226 mNeonGreen coding sequence with the AID degron sequence. This knockin line was fully  
227 functional as we did not observe *dys-1* loss-of-function phenotypes (e.g., exaggerated head  
228 bending, reduction in TWK-28 surface expression).

229 Confocal imaging revealed a broad distribution of DYS-1 on the outer face of muscle  
230 cells, facing the epidermis (Figure 2H). Consistent with the model that TWK-28 is recruited to  
231 the DAPC, DYS-1 and TWK-28 were well colocalized in the anterior tip of each muscle cell  
232 (Figure 2I). Hence, DYS-1 is also enriched at the tip of muscle cells, but also distributed more  
233 broadly throughout the sarcolemma.

234 We first tested whether DYS-1 could be degraded by observing the offspring of  
235 hermaphrodites grown on auxin (Figures 2G and 2H). Although a very small fraction of the  
236 dystrophin-associated fluorescence remained detectable, mNeonGreen fluorescence was  
237 drastically diminished in these auxin-treated worms (Figure 2H and 2I). Consistently, worms  
238 exposed to auxin throughout their life displayed the exaggerated head-bending phenotype  
239 observed in dystrophin null mutants, confirming effective dystrophin degradation. Moreover,  
240 the impact of DYS-1 degradation was comparable to *dys-1* null mutants (Figure 2A), since  
241 TWK-28 fluorescence was reduced by 73% relative to untreated animals (Figures 2I and 2K).

242 Using this assay, we could analyze dystrophin dynamics by monitoring fluorescence  
243 recovery over 24 hours, starting at the L4 larval stage (Figure 2G). After removing animal from  
244 auxin-supplemented media, we observed a partial restoration of DYS-1-mNeonGreen  
245 fluorescence throughout the muscle cell and at the anterior tip. TWK-28 fluorescence also  
246 recovered notably over the 24-hour time period, but did not reach wild-type levels (Figures 2J,  
247 2K). However, TWK-28 puncta remained closely associated with DYS-1, in line with a direct  
248 association of TWK-28 with the DAPC. Interestingly, the overall distribution of TWK-28 and  
249 DYS-1 in the comet-like domain was qualitatively different after recovery. It appeared broader  
250 and more dispersed than in wild type, which maintained a more condensed pattern (Figure  
251 2J). These data indicate that functional dystrophin complexes can be reassembled post-  
252 embryonically, and that TWK-28 requires continuous dystrophin presence to be maintained at  
253 the cell surface.

254

### 255 **Dystrophin-associated proteins localize to asymmetric membrane compartments**

256 To further characterize the subcellular distribution of dystrophin and dystrophin-associated  
257 proteins, we used CRISPR/Cas9 gene editing to label all members of the worm's DAPC  
258 complex<sup>23</sup>.

259 In vertebrates, dystroglycan is a central component of the DAPC, linking the  
260 extracellular matrix to the intracellular cytoskeleton via dystrophin. In *C. elegans*, dystroglycan  
261 expression has been reported in different cell types, but surprisingly not in muscle<sup>24</sup>. However,  
262 clear muscle expression of *dgn-1*, one of three worm dystroglycans, can be detected by single-  
263 cell RNA sequencing approaches<sup>11,17</sup>. Consistently, DGN-1 was clearly detectable in body wall  
264 muscles in our knock-in line, and DGN-1 was colocalized with DYS-1 on the outer face of  
265 muscle cells (Figure 3A). To more precisely describe DGN-1 distribution, we used the dense  
266 body marker, PAT-2/ $\alpha$ -integrin, as a cellular landmark<sup>25</sup>. Double labeling showed that both  
267 proteins occupy distinct membrane domains. Indeed, DGN-1 was excluded from dense bodies  
268 and M lines occupied by PAT-2 (Figures 3B, 3C and 3D), even using diffraction-limited light  
269 microscopy. These observations demonstrate that dystrophin and dystroglycan are present  
270 throughout the sarcolemma of worm muscle cells, and that the DAPC occupies specific  
271 membrane nanodomains, juxtaposed to integrin-containing attachment sites.

272 Sarcoglycans/Sgc are the other major integral membrane component of the DAPC. The  
273 Sgc complex is composed of several sarcoglycan subunits ( $\alpha$ ,  $\beta$ ,  $\gamma$ ,  $\delta$ ) in skeletal and cardiac  
274 muscles<sup>26</sup>. The *C. elegans* genome encodes three sarcoglycans, *sgca-1*, *sgcb-1*, and *sgn-1*,  
275 which are orthologs of  $\alpha$ -sarcoglycan,  $\beta$ -sarcoglycan, and  $\delta/\gamma$ -sarcoglycan, respectively<sup>23</sup>.  
276 According to previous reports<sup>19</sup> and transcriptomic data<sup>11</sup>, the three sarcoglycan genes are  
277 expressed in worm muscles. Using knockin lines, we confirmed their muscular expression and  
278 found that sarcoglycans are strictly co-localized (Figures S2A and S2B). In vertebrates,  
279 assembly of individual subunits into an oligomeric protein complex is necessary for trafficking  
280 to the plasma membrane of muscle cells. Loss of individual subunits strongly decreases  
281 sarcoglycan complex formation and membrane targeting<sup>26</sup>. We tested the interdependence of

282 worm Sgc *in vivo* and found that loss of individual sarcoglycan subunits also strongly disrupted  
283 the surface localization of the other two subunits in *C. elegans* (Figure S2C). Moreover,  
284 sarcoglycan surface expression was profoundly altered by removing dystrobrevin and  
285 dystrophin, either individually or together (Figure S2D). In *dyb-1* mutants, SGCB-1 surface  
286 expression was partly reduced in the anterior domain and essentially undetectable in the  
287 posterior punctate domain. In *dys-1* mutants, we found a stronger reduction of SGCB-1 and  
288 an overall modification of the structure of the anterior domain, rendering it more diffuse. This  
289 pattern was also observed in the double mutant, suggesting a dominant role of DYS-1 over  
290 DYB-1 for sarcoglycan localization.

291 Interestingly, sarcoglycan distribution was visibly different from DYS-1, as it appeared  
292 more confined (Figure 3E), and strongly resembled ISLO-1 (Figures 1D and 1E). Indeed,  
293 sarcoglycans are also found at the anterior tip of the muscle cell in a comet-like pattern, and  
294 cluster into a linear pattern of regularly-spaced punctate microdomains in the posterior part of  
295 the cell. These two opposite domains are separated by a small region that appears to be mostly  
296 devoid of sarcoglycan (Figure 3F). By comparing Sgc and PAT-2 localization, we could  
297 observe that, similarly to dystroglycans, sarcoglycans occupy membrane domains that are  
298 clearly juxtaposed to integrin complexes (Figure 3F).

299 Consistently, by comparing DGN-1 and Sgc distributions, we could observe partial  
300 colocalization, in particular in the anterior tip of muscles cells, but also in the posterior domain  
301 (Figure 3G). In the anterior domain, sarcoglycans mostly co-localized with DGN-1 using  
302 diffraction-limited microscopy. However, some DGN-1 puncta were devoid of sarcoglycan, and  
303 vice-versa, suggesting a heterogeneous organization of dystroglycan- and sarcoglycan-  
304 containing molecular complexes within the sarcolemma (Figure 3G, *anterior domain*). In the  
305 posterior part of the cell, the clearly distinguishable sarcoglycan nanodomains co-localized  
306 with puncta that were enriched in DGN-1, as compared with the remaining DGN-1 signal.  
307 Therefore, these distinct membrane distribution patterns suggest a molecular heterogeneity  
308 within the dystrophin-associated protein complex that further illustrates the complexity of the  
309 worm's sarcolemma.

310 Next, we analyzed the distribution of the dystrobrevin ortholog, DYB-1, and the two  
311 worm syntrophins STN-1 and STN-2. By comparing their subcellular distributions with DGN-1  
312 and SGCB-1, we observed find that they display two distinct and clearly recognizable  
313 localization patterns (Figures S3 and S4). Indeed, STN-2 was broadly expressed and  
314 colocalized precisely with DGN-1, while STN-1 and DYB-1 reproduced the more confined  
315 distribution pattern of sarcoglycans. Direct comparison of STN-1 and STN-2 confirmed this  
316 dichotomy. Finally, by using TWK-28 as a landmark, we confirmed that all DAPC proteins were  
317 colocalized with the channel at the anterior tip of muscle cells (Figure S5).

318 In conclusion, our systematic analysis has revealed that DAPC proteins define multiple  
319 membrane subcompartments at the surface of muscle cell, distinct of integrin attachment sites.  
320 The clear differences in the distribution of dystroglycans and sarcoglycans provide the first  
321 evidence for the existence of DAPCs with different protein compositions.

### 322 **Dystroglycan localization is dependent on perlecan and intracellular DAPC components**

324 In vertebrates, surface expression of dystroglycan is dependent on interactions with the  
325 extracellular matrix protein perlecan<sup>27</sup>, and also requires dystrophin<sup>28</sup> and dystrobrevin<sup>29</sup>. First,  
326 we tested the role of perlecan/*unc-52* using a viable isoform-specific nonsense allele (*e444*)  
327 that eliminates perlecan isoforms expressed in all but the most anterior muscle cells<sup>30</sup>. In these  
328 mutant worms, we observed a profound disruption of DGN-1 surface expression (Figure S2E),  
329 confirming a conserved genetic link between dystroglycans and perlecans in worms. Next, we

330 repeated the same analysis with mutants for dystrophin and dystrobrevin (Figure S2F). We  
331 observed no obvious modification of the dystroglycan pattern in dystrobrevin/*dyb-1* mutants.  
332 However, disruption of *dys-1* using the *syb2174* null allele reduced overall surface expression,  
333 disrupted the dense anterior domain, and rendered the DGN-1 pattern more diffuse.  
334 Concomitant loss of *dys-1* and *dyb-1* had no additional effect compared to *dys-1* alone.

335 While the requirement of dystrobrevin may not be conserved in worms, these results  
336 confirm the links between dystroglycan/DGN-1 and dystrophin/DYS-1 in *C. elegans* muscle.  
337

### 338 **Disheveled/DSH-1 controls the asymmetric distribution of membrane proteins**

339 While our forward genetic screen allowed us to demonstrate a requirement of DAPC proteins  
340 for the stabilization of TWK-28 channels at the cell surface, it did not reveal the mechanisms  
341 that underlie the striking asymmetric distribution of the channels or DAPC proteins within each  
342 muscle cell.

343 Several molecular pathways are known to generate tissue polarity in different cellular  
344 contexts. Generally, these involve Wnt ligand/receptor systems and specific proteins belonging  
345 to the core planar cell polarity (PCP) pathway<sup>6</sup>. We hypothesized that the polarized  
346 organization of TWK-28 could also result from the activity of such tissue polarity pathways,  
347 and undertook a candidate gene approach targeting Wnt and PCP genes that are conserved  
348 in *C. elegans*<sup>31</sup>.

349 The intracellular effector disheveled is a central player in these molecular cascades as  
350 it mediates both canonical and non-canonical Wnt signaling<sup>32</sup>. The *C. elegans* genome  
351 encodes three disheveled orthologs: *dsh-1*, *dsh-2*, and *mig-5*. Based on transcriptomic data,  
352 *dsh-2* shows little to no detectable expression in muscle cells, contrary to *dsh-1* and *mig-5*<sup>11</sup>.  
353 While mutation of *mig-5* had no defect (data not shown), when we combined a *dsh-1* null  
354 mutant with the fluorescent TWK-28, SLO-1, and TWK-24 knock-in lines, we observed a  
355 striking reorganization of the channels at the muscle surface, leading to a loss of their  
356 asymmetric distribution (Figures 4A and 4B). In particular, TWK-28 channels were now found  
357 at both extremities of the cell, giving rise to a head-to-tail configuration of anterior and posterior  
358 comets in adjacent muscle cells. SLO-1 and TWK-24 distribution was also clearly modified as  
359 their domains appeared to shift to a more central position in each cell.

360 To precisely analyze this redistribution, we measured the position –relative to the length  
361 of a given muscle cell– of the boundaries dividing sarcolemmal domains that included or that  
362 were devoid of channels (Figure 4C).

363 First, we found that the anterior border was unchanged in *dsh-1(0)* mutants for each  
364 ion channel. TWK-28 channels covered on average 30% of the anterior portion of the cell,  
365 while SLO-1 and TWK-24 boundaries were more anterior (23% and 21% respectively) and  
366 therefore overlapped slightly with the TWK-28 domain.

367 In contrast, the posterior borders were markedly displaced. In wild type, we could rarely  
368 detect a few clusters of TWK-28 channels at the posterior end of the cell, while in *dsh-1(0)*,  
369 TWK-28 channels covered over 25% of it. Thus, anterior and posterior TWK-28 domains were  
370 now almost symmetrical. In the case of SLO-1, the posterior boundary that usually extended  
371 almost to the end of the cell, now shifted anteriorly, uncovering close to a fourth of the posterior  
372 portion of the cell. Conversely, the TWK-24 domain extended more posteriorly in *dsh-1(0)*, now  
373 closely matching the distribution of SLO-1 channels. Interestingly, image segmentation of  
374 triple-labelled cells revealed that the three channels remained optically-separable even using  
375 diffraction-limited microscopy, suggesting that they still partition into physically distinct nano-  
376 domains within the sarcolemma (Figure 4D).



377 Next, we wondered whether the redistribution of TWK-28 channels also affected their  
378 surface expression levels. Based on fluorescence quantification of entire muscle cells, we  
379 found that the total number of channels was unchanged in *dsh-1* mutants. Indeed, TWK-28  
380 fluorescence was split between anterior and posterior comets, consistent with the respective  
381 size of each domain (Figure 4E). These data thus suggest that the number of TWK-28  
382 channels present at the cell surface is limited and finely regulated by mechanisms that are  
383 independent of disheveled/*dsh-1*.

384 Given the requirement of dystrophin for TWK-28 surface expression, we hypothesized  
385 that DYS-1 distribution must also be altered in *dsh-1* mutants. Using TWK-28 as a landmark,  
386 we could clearly observe that dystrophin was indeed present at both extremities of muscle  
387 cells (Figure 4F) in a *dsh-1* null mutant. The sarcoglycan SGCB-1 similarly adopted a  
388 symmetrical distribution pattern, further strengthening the notion that *dsh-1* plays a major role  
389 to ensure muscle cell asymmetry (Figure 4G).

390 Finally, to further investigate the interplay between processes that control TWK-28  
391 surface distribution via dystrophin and DSH-1, we used the TWK-28 mutant lacking the C-  
392 terminal PDZ-binding sequence (Figure 2C), as it decouples TWK-28 from the DAPC. Indeed,  
393 in this context, we could still detect an accumulation of TWK-28 channels at the posterior end  
394 in *dsh-1* null mutants (Figure 4H), arguing that TWK-28 channels are addressed to the  
395 extremities of muscle cells independently of their interaction with the DAPC, and that the  
396 DAPC likely serves to stabilize TWK-28 at the surface in a second step.

397 Taken together, these data support a model in which DSH-1 ensures that dystrophin  
398 and TWK-28 are not addressed or maintained at the posterior end of muscle cells, while the  
399 DAPC, subsequently and independently, stabilizes TWK-28 channels at the cell surface. The  
400 process that addresses DYS-1, SGCB-1, and TWK-28 to the extremities of muscle cells  
401 remains to be determined.

402

### 403 **The DIX domain of DSH-1 is dispensable for TWK-28 asymmetry**

404 Disheveled proteins comprise three conserved functional domains: DIX, PDZ and DEP (Figure  
405 5A). Generally, DIX and PDZ domains are required for canonical Wnt  $\beta$ -catenin signaling, while  
406 PDZ and DEP domains function in PCP signaling<sup>32</sup>. To investigate which pathways may act  
407 downstream of DSH-1 in muscle cells, we expressed a series of protein truncations in body  
408 wall muscle cells and monitored the rescue of TWK-28 localization in a *dsh-1* mutant  
409 background (Figure 5B). First, we verified that a *dsh-1a* cDNA was sufficient to restore TWK-  
410 28 localization (i.e., panel "+ *Pmyo-3::dsh-1a*"). Next, we expressed truncated *dsh-1a* cDNAs  
411 lacking each domain using the same muscle-specific promoter, and found that only the cDNA  
412 lacking the DIX domain restored TWK-28 localization in a *dsh-1* null mutant.

413 These results indicate that PDZ and DEP domains are indispensable for TWK-28  
414 targeting, pointing to an involvement of PCP-type signaling downstream of DSH-1. They also  
415 show that DSH-1 likely does not engage canonical  $\beta$ -catenin-dependent signaling in this  
416 context, a conclusion that was consistent with a lack of TWK-28 redistribution in *bar-1*/ $\beta$ -  
417 catenin mutant worms (Figure 5C).

418

### 419 **Sarcolemmal asymmetry requires Wnt/Ror but not PCP proteins**

420 Given the results of our DSH-1 structure-function analysis, we proceeded to test the possible  
421 involvement of genes belonging to the two planar polarity pathways: the core PCP proteins,  
422 VANG-1/Stan, FMI-1/Flamingo, and PRKL-1/Prickle, and the global proteins, CDH-  
423 1/Dachsous and CDH-3/CDH-4/Fat. Surprisingly, none of these genes were required for  
424 planar-polarized TWK-28 localization (Figure 5C).



425 Given these results, we investigated the involvement of Wnt-dependent pathways.  
426 First, we tested a viable *mig-14*/Wntless hypomorphic mutant that reduces the secretion of  
427 Wnt ligands and found that it led to a loss of TWK-28 polarity (Figure 5D). Next, we analyzed  
428 viable mutants for four Wnt ligands and found that *egl-20* altered the localization of TWK-28  
429 (Figures 5D). Finally, we tested five transmembrane proteins that bind Wnt ligands: the Wnt  
430 receptors LIN-17, MIG-1, CFZ-2, LIN-18/Ryk and the receptor tyrosine kinase CAM-1/ROR.  
431 *lin-17* and *lin-18*, alone, and *mig-1 cfz-2* double mutants had no effect (Figures S6A and S6B),  
432 while the reference allele of *cam-1* phenocopied *egl-20* mutants (Figures 5D and 5E). To  
433 confirm these results, we generated an early stop codon at position Pro21 in EGL-20 using  
434 CRISPR/Cas9 gene editing (Figure S6C), and analyzed three additional *cam-1* alleles (*ak37*,  
435 *cw82*, *ks52*) (Figures 5E and 5F). These four additional mutant alleles all showed phenotypes  
436 identical to the reference alleles.

437 Observing the impact of these gene mutations in more detail along the entire length of  
438 the animal provided some additional information about the molecular actors upstream of  
439 disheveled. Indeed, *mig-14*, *egl-20*, and *cam-1* mutants only affected the distribution of TWK-  
440 28 in muscle cells that were posterior or close to the vulva (anteriorly), while *dsh-1* mutation  
441 also affected muscle cells situated more anteriorly (Figure 5D).

442 This spatially-restricted effect is consistent with the known range of the EGL-20  
443 gradient that is formed by secretion from cells in the tail of the worm, extending to the  
444 midbody<sup>33,34</sup>. Furthermore, *cam-1* mutation also did not affect cells anterior to the vulva, which  
445 could indicate that a different Wnt receptor/Wnt ligand combination is acting in these cells, or  
446 that redundant pathways control muscle polarity in the anterior half of the worm.

447

#### 448 **Subcellular distribution of DSH-1 in body wall muscle cells**

449 To gain further insight into how DSH-1 controls muscle membrane asymmetry, we analyzed  
450 the subcellular distribution of DSH-1 in three translational knockin lines in which the  
451 mNeonGreen coding sequence was inserted at the N- and C-terminus, and between the DIX  
452 and PDZ domains<sup>25</sup> of DSH-1.

453 To ensure that these mNeonGreen-tagged DSH-1 chimeras remained functional, we  
454 used TWK-28 localization as a proxy for DSH-1 function. Interestingly, although the three lines  
455 showed similar fluorescence patterns, only the N- and C-terminal insertions were fully  
456 functional, while TWK-28 channels were mislocalized in the intra-molecular insertion line (data  
457 not shown).

458 Using the C-terminally tagged *dsh-1* alleles (*bab365*), we analyzed the distribution of  
459 DSH-1 proteins within muscle cells. Remarkably, DSH-1 was enriched in the posterior third of  
460 body wall muscle cells (Figures 6A and 6B), clearly distinct of TWK-28's anterior localization  
461 (Figures 6C). This pattern was lost in *cam-1* and *egl-20* mutants (Figures S7A). Interestingly,  
462 while *egl-20* disrupted DSH-1 localization only in muscle cells that were posterior to the vulva—  
463 consistent with the EGL-20 gradient—, loss of *cam-1* affected DSH-1 distribution all along the  
464 body. Yet, TWK-28 asymmetry was not affected in *cam-1* mutants anterior to the vulva.

465

#### 466 **DSH-1 is continuously required to establish and maintain muscle membrane polarity**

467 Next, we wondered whether muscle polarity was a fixed or a dynamic state, i.e., whether DSH-  
468 1 was only required to establish muscle polarity, or also to maintain it throughout the life of the  
469 worm. Therefore, in addition to mNeonGreen, we inserted the AID degron sequence into our  
470 DSH-1-mNeonGreen knockin line to be able to manipulate DSH-1 protein levels and study its  
471 temporal window of action.

472 First, to validate this approach, we exposed fourth stage (L4) larvae to auxin and –three  
473 days later– analyzed their F1 progeny at the L4 stage. Using a transgenic line expressing TIR1  
474 ubiquitously, we could observe a robust degradation of DSH-1-mNeonGreen and a clear  
475 redistribution of TWK-28 channels into a symmetrical localization pattern, phenocopying the  
476 *dsh-1(0)* mutant (Figure S7B).

477 Next, to determine the appropriate time window for DSH-1 degradation, we observed  
478 the localization pattern of TWK-28 during the first three larval stages, in wild-type and *dsh-1(0)*  
479 worms (Figure 6D). While muscle polarity was fully established at the second (L2) and third  
480 (L3) larval stages, we observed both polarized and non-polarized cells in freshly-hatched (L1)  
481 larvae. This suggests that TWK-28 polarity is mostly established during embryogenesis, and  
482 that it may derive from an initially non-polarized state.

483 We also noted that the shape of TWK-28-containing comets changed progressively.  
484 Only a small number of fluorescent clusters were observed in the L1. In the L2 and L3 stages,  
485 the number of clusters increased, accompanied by a widening of the comet over time. Loss of  
486 *dsh-1* disrupted muscle polarity at all larval stages (Figure 6D).

487 To determine whether *dsh-1* was required to maintain muscle polarity once it was  
488 established, we started degrading DSH-1-mNeonGreen at the L3 larval stage and observed  
489 these worms 72 hours later. This protocol led to a clear loss of TWK-28 asymmetry,  
490 demonstrating that muscle polarity is a dynamic state, and that DSH-1 is continuously required  
491 to maintain it (Figure 6E).

492 Conversely, we asked whether restoring DSH-1 expression post-embryonically could  
493 restore muscle polarity starting from a non-polarized state. In this case, we exposed animals  
494 to auxin until the L3 stage, and monitored the recovery of DSH-1 levels and muscle polarity  
495 over 72 hours (Figure 6F). First, as in our initial experiment with L4 stage animals (Figure S7B),  
496 L3 animals exposed to auxin throughout their life also showed a clear loss of muscle polarity  
497 and an absence of DSH-1-associated fluorescence. Next, over the course of the 72-hour  
498 recovery period (i.e., in the absence of auxin) we could observe a clear restoration of the  
499 polarity pattern.

500 These two complementary experiments directly demonstrate that DSH-1 is required –  
501 thorough the life of the animal– to establish and to maintain the polarity of *C. elegans* muscle  
502 cells, and that this state is therefore dynamic and could be regulated by extracellular signals  
503 that would impact DSH-1 activity.

504

505

## 506 **DISCUSSION**

507 By analyzing the subcellular distribution of potassium channels and proteins linked to the  
508 dystrophin-associated protein complex, we reveal here the previously unsuspected  
509 compartmentalization and planar-polarized organization of the sarcolemma of *C. elegans*  
510 muscle cells. Despite decades of detailed work on the structure of *C. elegans* muscle cells<sup>7</sup>,  
511 this remarkable case of cellular polarization was entirely unsuspected.

512

### 513 **Sarcolemmal asymmetry at the cellular scale**

514 Our initial analysis of single-cell RNAseq data and other published reports had indicated that  
515 up to 21 potassium channel subunits could be co-expressed in body wall muscle cells. Apart  
516 from the extensive work regarding the precise targeting of ligand-gated ion channels to the  
517 ends of muscle arms<sup>8</sup>, whether ion channels could be differentially targeted to different parts  
518 of the sarcolemma has been rarely addressed specifically. By revealing the distinct subcellular  
519 localization patterns of different potassium channels, we have demonstrated that clear

520 differences exist in the molecular composition of the muscle's plasma membrane. For instance,  
521 while TWK-8 and TWK-18 channels are found throughout the sarcolemma, TWK-12 and TWK-  
522 43 channels are only targeted to the basolateral membrane and muscle arms. Conversely,  
523 TWK-28 and TWK-42 channels are only found on the outer side of the muscle cell, facing the  
524 epidermis, and not on the lateral membrane or muscle arms. Importantly, the comparison of  
525 TWK-28, TWK-24 and SLO-1 channels shows that even when channels are located in the  
526 same region of the sarcolemma (i.e., the outer face of the cell), they can occupy distinct –yet  
527 partially overlapping– regions along the antero-posterior axis. And even when they are present  
528 in overlapping regions, we could show that ion channels remain confined to distinct  
529 nanodomains. The high reproducibility of these patterns between different individuals and  
530 within muscle cells of a single animal imply that specific molecular and cellular mechanisms  
531 must target individual channels to their respective domains, likely endowing them with distinct  
532 electrophysiological properties.

533 Another remarkable observation is the difference in organization of TWK-28, ISLO-1  
534 and SLO-1. ISLO-1 interacts with SLO-1 and the syntrophin STN-1, allowing the recruitment  
535 of the BK potassium channel to the DAPC, and mutations of *islo-1* and *dys-1* disrupt surface  
536 expression of SLO-1 in muscle cells<sup>9</sup>. However, we have shown here that ISLO-1 and SLO-1  
537 localization patterns are not identical since ISLO-1 is also present in the comet-like domain at  
538 the anterior tip of each muscle cell. Similarly, we have found that *islo-1*, *dys-1* and syntrophins  
539 are necessary for TWK-28 surface expression, but TWK-28 is nevertheless restricted to the  
540 anterior domain. Notably, even when cellular polarity is disrupted by mutations in *Wnt/Ror* and  
541 *dsh-1*, the posteriorly-localized TWK-28 does not reproduce the posterior, punctate, ISLO-1  
542 pattern, but rather mirrors the comet-like distribution seen at the anterior tip in wild-type  
543 animals. Therefore, there are likely specific molecular actors that allow the selective  
544 recruitment of TWK-28 and SLO-1 to distinct anterior and posterior domains. Forward genetic  
545 screens could directly address this question in the future by identifying gene mutations in which  
546 TWK-28 or SLO-1 channels are no longer restricted to their anterior or posterior domains, but  
547 rather redistributed into an ISLO-1-like pattern.

548

### 549 **The dystrophin-associated complex as an organizer of plasma membrane** 550 **compartments**

551 Detailed analyses of the distribution of DAPC proteins further highlight the complex  
552 organization of the muscle membrane. At first glance, DAPC components can be separated  
553 into two classes: one class that includes DGN-1, DYS-1 and STN-2, and the other that consists  
554 of sarcoglycans, DYB-1 and STN-1. One-to-one colocalization studies however reveal that  
555 there is significant overlap between both groups. For example, the posterior sarcoglycan  
556 puncta coincide with areas of denser DGN-1 signal, which is surrounded by weaker DGN-1-  
557 associated fluorescence. This could be explained by different diffusion kinetics with one  
558 predominant population of confined sarcoglycans versus two populations of confined *versus*  
559 freely diffusing dystroglycans. Fluorescence recovery or photoconversion approaches could  
560 be used in the future to address this question *in vivo*.

561 Although DAPC proteins are generally thought to be part of the same molecular  
562 complex, our observations challenge the notion of a singular DAPC composition. For example,  
563 we observed a heterogeneous organization of dystroglycan- and sarcoglycan-containing  
564 molecular complexes in the anterior tip of muscle cells where some DGN-1 puncta were devoid  
565 of sarcoglycan, and vice-versa. In mammals, while costameric DAPCs are thought to contain  
566 all components, the situation is also more complex at the neuromuscular junction where they  
567 are all present but not colocalized and not involved in the same functions<sup>35</sup>. It is also interesting

568 to note the clear separation of DAPC and integrin complexes in worm muscles. Using  
569 diffraction-limited microscopy, fluorescent markers could be easily distinguished suggesting  
570 that they are situated far from each other, thus refining previous analyses that suggested a  
571 close association with dense bodies in the I-band<sup>36</sup>. It thus remains to be determined which  
572 molecular partners or scaffolds underpin the highly stereotyped subcellular distribution of  
573 DAPC proteins.

574 To definitively clarify DAPC localization in worm muscles and determine the exact  
575 molecular makeup of dystrophin-containing nanodomains, it will be essential to move beyond  
576 diffraction-limited microscopy and resort to state-of-the-art super-resolution techniques. The  
577 vast increase in resolution afforded by super-resolution light microscopy will clarify the  
578 composition of membrane nanodomains and relative distribution of dystrophin and its  
579 associated proteins. As shown here, dystrophin and sarcoglycans occupy both overlapping  
580 and distinct sub-membrane domains. Yet, even when they appear co-localized using  
581 conventional confocal microscopy, they could still occupy distinct nanodomains. Refining their  
582 relative location will reveal the heterogeneity within DAPC complexes at the surface of muscle  
583 cells. Similarly, the two worm syntrophins, STN-1 and STN-2, have distinct and partially  
584 overlapping distribution patterns in muscle cells. We have also found that they contribute  
585 differently to the surface expression of the potassium channel TWK-28. Fly and vertebrates  
586 also co-express multiple syntrophins with different subcellular localizations and functions<sup>37</sup>.  
587 Thus, understanding the interplay between these two worm syntrophins may provide new  
588 leads on the mode of action of syntrophins.

589 Interestingly, recent observations in different cellular contexts have revealed intriguing  
590 asymmetric distribution patterns and functions of the DAPC. Indeed, precise *in vivo* studies of  
591 dystrophin in mouse models have been greatly improved by the generation of GFP-tagged  
592 mouse knockin lines. These models have confirmed the broad distribution of dystrophin along  
593 the membrane of muscle fibers<sup>38,39</sup> but also revealed a striking enrichment<sup>38,39</sup> at the extremities  
594 of muscle fibers<sup>40</sup>. Asymmetric localization of dystrophin has also been described in zebrafish  
595 muscles<sup>41</sup>. Analysis of a gene trap line that fluorescently labels the endogenous dystrophin  
596 protein showed that dystrophin is highly enriched at myosepta –the contact site that separate  
597 two somites– forming a repetitive chevron-like structure along the length of the body of the  
598 fish. During development, more dystrophin is recruited to this interface, exacerbating the  
599 asymmetric organization of dystrophin within growing muscle fibers. In activated rodent muscle  
600 stem cells (i.e., satellite cells) dystrophin is located apically in close contact with the  
601 extracellular matrix. This polarized distribution of dystrophin regulates the asymmetric division  
602 of satellite cells via the recruitment of the serine-threonine kinase Par1b<sup>42</sup>. In drosophila  
603 epithelial follicle cells, recent functional studies have shown that the DAPC promotes planar  
604 polarization of integrin clusters and participates in the trafficking of ECM components leading  
605 to the formation of polarized fibrils<sup>43</sup>. These observations suggest that the DAPC may be at the  
606 heart of cellular mechanisms that precisely define subcellular cortical domains allowing specific  
607 functions to be compartmentalized within a single cell.

608

### 609 **Planar cell polarity at the scale of the muscle tissue**

610 The *C. elegans* body wall muscle tissue is organized in four quadrants that are each composed  
611 of two bands of successive muscle cells<sup>7</sup> (Figure 1A). Each muscle quadrant is essentially a  
612 single layer of muscle cells that runs along the length of the animal. The asymmetrical  
613 distribution of potassium channels and DAPC proteins within each muscle cell therefore  
614 translates into a prototypical planar polarity pattern. Most planar cell polarity genes are  
615 conserved in the *C. elegans* genome<sup>31</sup>. The role of VANG-1, PRKL-1, and FMI-1 in cell



616 migration-related processes have been well established. PCP proteins regulate cell  
617 intercalation, convergent extension movements, neuronal migration, neurite outgrowth and  
618 guidance. However, in contrast to planar cell polarity in fly epithelia, worm PCP proteins act on  
619 an individual cell basis rather than via cell-cell contact-dependent polarization processes. They  
620 have been mostly found to control asymmetry pathways that instruct antero-posterior polarity  
621 and asymmetric cell divisions during embryogenesis and larval stages. They also control the  
622 asymmetric divisions of the stem-cell-like epithelial seam cells. Their action in these contexts  
623 is transient. In contrast, the planar polarity patterns we have described here remain visible  
624 throughout the life of the cell. Consistently, continuous activity of DSH-1 is required to maintain  
625 membrane organization and muscle polarity. Indeed, by manipulating DSH-1 levels at different  
626 life stages, we could demonstrate that muscle polarity is not a fixed state, established early on  
627 in muscle cells. Continuous requirement of DSH-1 argues that it controls a dynamic machinery.  
628 It will therefore be essential to identify the molecular targets of DSH-1 in muscle cells, and to  
629 identify additional factors required to establish and maintain muscle polarity. Further work will  
630 be required to dissect the molecular and cellular signaling pathways that control this novel  
631 example of planar cell polarity in the nematode *Caenorhabditis elegans*.

632  
633  
634

## 635 **ACKNOWLEDGEMENTS**

636 We thank Hannes Bülow and Jean-Louis Bessereau for critical reading and comments about  
637 the manuscript. This work was funded by a grant to T.B. from the European Research Council  
638 (ERC Stg 2013, *Kelegans*) and AFM Téléthon (Alliance MyoNeurALP). A.P. was supported by  
639 AFM Téléthon and LabEx CORTEX. We thank *Le Centre d'Imagerie Quantitative Lyon-Est*  
640 (LyMIC-CIQLE, Lyon, France) imaging facility for support and access to equipment. Some  
641 strains were generated by SEGiCel (SFR Santé Lyon Est CNRS UAR 3453, Lyon, France)  
642 with funding provided by TEFOR to K. Gieseler. Some strains were provided by the CGC,  
643 which is funded by NIH Office of Research Infrastructure Programs (P40 OD010440). Some  
644 strains were provided by the National Bioresource Project at the Tokyo Women's Medical  
645 University School of Medicine, which is part of the International *C. elegans* Gene Knockout  
646 Consortium.

647

648 The authors declare no competing financial interests.

649

## 650 **MATERIALS & METHODS**

651

### 652 **RESOURCE AVAILABILITY**

#### 653 **Lead Contact**

654 Further information and requests for resources and reagents should be directed to and will be  
655 fulfilled by the Lead Contact, Thomas Boulin ([thomas.boulin@univ-lyon1.fr](mailto:thomas.boulin@univ-lyon1.fr)).

656

#### 657 **Materials Availability**

658 Worm strains and plasmids generated in this study are available upon request.

659

## 660 **EXPERIMENTAL MODEL AND SUBJECT DETAILS**

### 661 **Strains and genetics**

662 All *C. elegans* strains were originally derived from the wild-type Bristol N2 strain. Worm  
663 cultivation, genetic crosses, and manipulation of *C. elegans* were carried out according to  
664 standard protocols<sup>44</sup>. All strains were maintained at 20°C on nematode growth medium (NGM)  
665 agar plates with *Escherichia coli* OP50 as a food source. Strains and alleles used for this study  
666 are listed in Supplementary Table S1 and S2, respectively.



667

## 668 **METHOD DETAILS**

### 669 **Molecular biology**

670 Single-strand oligonucleotides, crRNA, and plasmids used in this study are described in  
671 Supplementary Table 3, 4, and 5, respectively.

672

### 673 **Auxin-induced degradation**

674 Auxin plates were prepared by adding auxin Indole-3-Acetic Acid (Sigma) from a 400 mM stock  
675 solution in ethanol into NGM at the final concentration of 1 mM<sup>22</sup>. DYS-1 and DSH-1  
676 degradation was performed using a transgene expressing TIR1 with the ubiquitous promoter  
677 *Peft-3*<sup>45</sup>. Protein degradation was monitored *in vivo* based on mNeonGreen fluorescence.

678

### 679 **Microscopy imaging and quantification**

680 **General methods** Freely moving worms were observed on nematode growth media (NGM)  
681 plates using an AZ100 microscope (Nikon) equipped with a Flash 4.0 CMOS camera  
682 (Hamamatsu Photonics). For confocal imaging, animals were mounted on 2% dry agarose  
683 pads with 2% poly-lysine beads in M9 buffer (3 g KH<sub>2</sub>PO<sub>4</sub>, 6 g Na<sub>2</sub>HPO<sub>4</sub>, 5 g NaCl, 0.25 g  
684 MgSO<sub>4</sub>·7 H<sub>2</sub>O, and distilled water up to 1 liter). Confocal imaging was performed using an  
685 inverted confocal microscope (Olympus IX83) equipped with a confocal scanner unit spinning-  
686 disk scan head (Yokogawa) and an EMCDD camera (iXon Ultra 888, Andor) at the Ciqle  
687 imaging facility (Centre d'Imagerie Quantitative Lyon-Est, LyMIC-CIQLE, Lyon, France).

688

689 **TWK-28-mNeonGreen fluorescence intensity quantification** Quantification of fluorescent  
690 images were performed using ImageJ (version: 2.0.-rc-69/1.53a). Each data point represents  
691 one muscle cell and data from at least three independent imaging sessions were pooled for  
692 each genotype. Acquisition parameters were the same across genotypes for quantitative  
693 analyses. Fluorescence intensity was measured from Figure 2A to 2E) in a region of interest  
694 of 30 μm (wide) x 5 μm (high) size, and for Figure 2K in a region of interest of 50 μm (wide) x  
695 5 μm (high) size. To quantify the fluorescence intensity of TWK-28 in figure 4E, we first  
696 segmented individual muscle cells using TWK-12::wrmScarlet to outline the muscle  
697 membrane. The total fluorescence intensity was corrected by subtracting background  
698 fluorescence from the middle of the cell, where TWK-28 was undetectable.

699

700 **Measurement of TWK-28, TWK-24 and SLO-1 domain boundaries** To determine the  
701 precise outline of individual muscle cells, we used TWK-12::wrmScarlet for cell membrane  
702 segmentation. We then manually measured the length of each cell and the relative position of  
703 the TWK-28, TWK-24 and SLO-1 domain boundaries along the antero-posterior axis (Figure  
704 4C).

705

### 706 **Electrophysiology and heterologous expression of TWK-28 in *Xenopus laevis* oocytes**

707 Capped mRNAs were synthesized *in vitro* from linearized expression vectors using the T7  
708 mMessage mMachine kit (Ambion, Austin, TX, USA). Defolliculated *X. laevis* oocytes (Ecocyte  
709 Bioscience, Dortmund, Germany) were injected with 50 nL containing 1.8 ng of crRNA. Oocytes  
710 were kept at 18°C in ORII Calcium solution containing (in millimolar): 82.5 NaCl, 2 KCl, 1  
711 MgCl<sub>2</sub>, 0.7 CaCl<sub>2</sub>, 5 HEPES, gentamicin (25 μg/mL), pH 7.5 (with TRIZMA-Base).

712 Two-electrode voltage clamp (TEVC) experiments were performed 24 hours after  
713 microinjection. Oocytes were mounted in a small home-made recording chamber and  
714 continuously superfused with ND96 solution containing (in millimolar): 96 NaCl, 2 KCl, 1.8  
715 CaCl<sub>2</sub>, 2 MgCl<sub>2</sub>, 5 HEPES. pH 7.4 was adjusted with Trizma base. Macroscopic currents were  
716 recorded using a Warner Instrument OC-725 amplifier, filtered at 10kHz, digitized using a  
717 Digidata-1322 (Axon Instrument). For current visualization and stimulation protocol application,

718 we used Axon pClamp 9 software (Molecular Devices, Sunnyvale, CA). Recording electrodes  
719 were pulled to 0.2-1.0 M $\Omega$  by using a horizontal puller (Sutter Instrument, Model P-97, USA)  
720 and filled with 3 M KCl. Currents were recorded in response to a voltage-step protocol  
721 consisting of a pre-pulse of -80 mV (80 ms duration) from a holding potential of -60 mV,  
722 followed by 10 mV steps (200 ms duration) from -150 mV to +50 mV, and return to a -60 mV  
723 holding potential. Current-voltage curves were obtained by plotting the steady-state currents  
724 at the end of each voltage step.

725

### 726 **QUANTIFICATION AND STATISTICAL ANALYSIS**

727 The statistical analysis was performed using the R software package. Normality of sample  
728 distributions was assessed using the Shapiro-Wilks normality test before choosing parametric  
729 (Student's *t* test) or a non-parametric (Mann-Whitney) tests, as indicated in relevant figure  
730 legends. Graphs were plotted using the PlotsOfData service<sup>46</sup>.

731

732 **FIGURE LEGENDS**

733

734 **Figure 1. Ion channel localization reveals elaborate muscle membrane**  
735 **compartmentalization**

736 (A) Schematic diagram of the organization of the *C. elegans* musculature in the head and  
737 midbody region. Dorso-ventral view of two out of four muscle quadrants. Successive muscle  
738 cells are labeled in green and grey. Anterior (*Ant*) to the left, posterior (*Pos*) to the right.

739 (B) Asymmetric localization of TWK-28, TWK-24 and SLO-1 channels. Muscle membrane  
740 labeled by TWK-12-wrmScarlet, magenta.

741 (C) Image segmentation reveals little to no co-localization of ion channels in triple-labeled  
742 muscle cell using TWK-28 (cyan), TWK-24 (magenta), and SLO-1 (green) fluorescent knockin  
743 lines.

744 (D) SLO-1 and ISLO-1 distributions overlap exclusively in the posterior domain. ISLO-1 is also  
745 found in the anterior domain of the muscle cell.

746 (E) TWK-28 and ISLO-1 distributions overlap in the anterior domain of muscle cells. Rightmost  
747 column, magnified view of anterior region of individual muscle cells.

748 Regions of interest in (D) and (E): *Anterior domain*, comet-like domain at anterior tip of muscle  
749 cells; *Posterior domain*, punctate clustered pattern in posterior part of muscle cells.

750 Muscle cell outlines are indicated with yellow dashed lines. Scale bars, 20  $\mu\text{m}$ .

751

752 **Figure 2. TWK-28 surface expression is dependent on dystrophin and DAPC-associated**  
753 **proteins**

754 (A) Confocal detection and quantification of mNeonGreen-TWK-28 in a *dys-1* molecular null  
755 allele (*syb2174*) and a long-isoform-specific *dys-1* mutant (*bln582*).

756 (B) Confocal detection and quantification of mNeonGreen-TWK-28 in *dyb-1(cx36)* and *islo-*  
757 *1(bln549)* loss-of-function mutants.

758 (C) C-terminal sequence of the TWK-28 $\Delta$ PDZ variant engineered by gene editing of  
759 mNeonGreen-TWK-28 to eliminate a putative PDZ-binding motif (orange residues).

760 (D) Confocal detection and quantification of mNeonGreen-TWK-28 in *stn-1(ok292)* and *stn-*  
761 *2(ok2417)* loss-of-function mutants, and of an mNeonGreen-TWK-28 knockin line lacking the  
762 final four C-terminal amino acids (*twk-28 $\Delta$ PDZ*).

763 (E) Confocal detection and quantification of mNeonGreen-TWK-28 and mNeonGreen-*twk-*  
764 *28 $\Delta$ PDZ* in a *dys-1(syb2174)* molecular null allele.

765 (F) TWK-8, TWK-18, TWK-24, and TWK-42 expression and subcellular distributions are  
766 unchanged in *dys-1(bln582)* loss-of-function mutant. Representative images of head  
767 musculature.

768 (G) DYS-1 degradation protocol. L4 (P0) worms are transferred to auxin-containing media at  
769 day 0 (D0). F1 progeny are exposed to auxin until the L4 stage (ON Auxin) and transferred to  
770 NGM plates (OFF Auxin) for 24h. Confocal detection and quantification of fluorescence at day  
771 3 (D3) and 24 hours later (D3 + 24h).

772 (H) DYS-1-AID-mNeonGreen is strongly degraded after lifelong exposure to auxin (ON Auxin,  
773 D3). Partial recovery 24 h after removal from auxin (OFF Auxin, D3 + 24h).

774 (I), (J) Confocal detection of wrmScarlet-TWK-28 and DYS-1-AID-mNeonGreen at D3 and  
775 D3 + 24h, in the absence of auxin (NO Auxin, age-matched controls), after auxin exposure for  
776 three days (ON Auxin), and after removal from auxin for 24h (OFF Auxin).

777 (K) Quantification of wrmScarlet-TWK-28 fluorescence.

778 Mann-Whitney test,  $n > 30$  in all samples; n.s., not significant, \*  $p < 0.05$

779 Scale bars, 20  $\mu\text{m}$

780

781 **Figure 3. Dystrophin, dystroglycan and sarcoglycans define asymmetrical membrane**  
782 **compartments at the surface of *C. elegans* muscle cells**

783 (A) DGN-1 and DYS-1 distributions overlap in body wall muscle cells.

784 (B) DGN-1 localizes to sarcolemmal domains devoid of  $\alpha$ -integrins/PAT-2. Representative  
785 images of head muscle cells of DGN-1-wrmScarlet (in magenta) and PAT-2-mNeonGreen (in  
786 green) translational fusion knockin lines.

787 (C), (D) DGN-1 and PAT-2 occupy juxtaposed and optically-separable membrane domains.  
788 Enlargement of images shown in panel B.

789 (E) SGCB-1 and DYS-1 distributions overlap only partially in body wall muscle cells.

790 (F) SGCB-1 partitions into distinct membrane domains along the antero-posterior axis of  
791 individual muscle cells. *Anterior domain*, comet-like domain. *Gap domain*, sparse localization.  
792 *Posterior domain*, clustered pattern aligned with, but optically-separable from, PAT-2-labeled  
793 dense bodies.

794 (G) DGN-1 and SGCB-1 patterns only partially coincide in the anterior and posterior regions  
795 of muscle cells.

796 Muscle cell outlines are indicated with yellow dashed lines. Scale bars, 20  $\mu$ m.

797

798 **Figure 4. Loss of DSH-1/disheveled disrupts the planar-polarized organization of the**  
799 **muscle plasma membrane**

800 (A), (B) Symmetrical distribution of TWK-28, SLO-1 and TWK-24 in *dsh-1(ok1445)* loss-of-  
801 function background. Muscle membrane labeled by TWK-12-wrmScarlet, magenta.

802 (B) Magnified view of single muscle cells in wild type and *dsh-1(ok1445)*.

803 (C) Quantification of TWK-28, SLO-1 and TWK-24 domain boundary positions in wild type and  
804 *dsh-1(ok1445)*. Average position of anterior (*Ant*) boundaries in wild type (black) and *dsh-1*  
805 *(ok1445)* (red), respectively, as percentages of muscle cell length: TWK-28, 31% and 30%;  
806 SLO-1, 24% and 23%; TWK-24, 23% and 21%. Average position of posterior (*Pos*) boundaries  
807 in wild type and *dsh-1(ok1445)*, respectively, as percentages of muscle cell length: TWK-28,  
808 97% and 73%; SLO-1, 90% and 78%; TWK-24, 68% and 80%. Gray and red bars indicate the  
809 region containing each ion channel. Number of cells assayed in each condition: TWK-28 (WT,  
810 n=29; *dsh-1*, n=25); SLO-1 (WT, n=30; *dsh-1*, n=26); TWK-24 (WT, n=33; *dsh-1*, n=26).

811 (D) Image segmentation reveals little to no co-localisation of ion channels in *dsh-1*-mutant  
812 muscle cell using TWK-28 (cyan), TWK-24 (magenta), and SLO-1 (green) fluorescent knockin  
813 lines.

814 (E) Total TWK-28 surface expression is unchanged in *dsh-1(ok1445)* as TWK-28 is  
815 redistributed between the anterior and posterior domains. Mann-Whitney test, n.s. non-  
816 significant, \*  $p < 0.05$ .

817 (F) Symmetrical distribution of DYS-1 and TWK-28 at extremities of muscle cells in *dsh-1*  
818 *(ok1445)*.

819 (G) Symmetrical distribution of SGCB-1 in *dsh-1(ok1445)*.

820 (H) Symmetrical distribution TWK-28 lacking the PDZ binding-motif in *dsh-1(ok1445)*. White  
821 arrowhead indicate remaining fluorescent signal.

822 Muscle cell outlines are indicated with yellow dashed lines. Scale bars, 20  $\mu$ m.

823

824 **Figure 5. Loss of MIG-14/Wntless, EGL-20/Wnt and CAM-1/Ror disrupts asymmetric**  
825 **localization of TWK-28**

826 (A) Schematic protein structure of DSH-1a including DIX, PDZ, DEP domains.

827 (B) Muscle-specific expression of full-length or DIX domain-truncated DSH-1a proteins  
828 rescues TWK-28 localization in *dsh-1(ok1445)*. PDZ and DEP domains are necessary for  
829 DSH-1 function.  
830 (C) Planar-polarized distribution of TWK-28 is maintained in the absence of core planar cell  
831 polarity components (*vang-1*, *fmi-1*, *prkl-1*), Cadherin/Fat/Dachsous pathway components  
832 (*cdh-1*, *cdh-3*, *cdh-4*), or  $\beta$ -catenin (*bar-1*).  
833 (D) Loss of MIG-14/Wntless, EGL-20/Wnt, and CAM-1/Ror disrupts polarized localization of  
834 TWK-28. Anterior mid-body muscle cells in *mig-14*, *cam-1* and *egl-20* mutants are wild type.  
835 Posterior mid-body muscle cells are affected in all mutant genotypes.  
836 (E) Schematic protein structure of CAM-1/Ror receptor, with corresponding molecular lesions  
837 in point mutants (*gm122* and *cw82*), and deletion alleles (*ak37* and *ks52*).  
838 (F) *cam-1(ak37)*, *cam-1(ks52)* and *cam-1(cw82)* disrupt TWK-28 localization in posterior mid-  
839 body muscles.  
840 Left- or right-pointing yellow arrowheads indicate anterior or posterior extremity of muscle cells,  
841 respectively. Scale bars, 20  $\mu$ m.

842

843 **Figure 6. DSH-1/disheveled is required to establish and maintain muscle membrane**  
844 **polarity**

845 (A) Representative micrograph of a DSH-1 mNeonGreen translational knockin line. DSH-1 is  
846 enriched in the posterior portion of body wall muscle cells. DSH-1::mNeonGreen is visible in  
847 ventral nerve cord motoneuron cell bodies and neurites. Ventral view.  
848 (B) DSH-1::mNeonGreen distribution in a single muscle cells. Muscle membrane labeled by  
849 TWK-12-wrmScarlet, magenta. Average position of DSH-1 domain boundary, 72 % of muscle  
850 cell length, n=29. *Ant*, anterior. *Pos*, posterior. Gray bar indicates the region containing DSH-  
851 1.  
852 (C) DSH-1 and TWK-28 are found at opposite ends of muscle cells. Yellow or white  
853 arrowheads and dashed lines indicate the anterior or posterior end of muscle cells,  
854 respectively.  
855 (D) Asymmetric localization of TWK-28 in L1, L2, and L3 larval stages. Non-polarized muscle  
856 cells are found in wild-type at the L1 stage. Loss of *dsh-1* disrupts muscle cell polarity at all  
857 stages. Muscle cells are labeled with cytoplasmic mCherry in the L1 stage and outlined with  
858 white dotted lines.  
859 (E) DSH-1 is required to maintain muscle polarity during post-embryonic development.  
860 (F) Defective muscle polarity is restored by re-expression of DSH-1 during post-embryonic  
861 development.  
862 White arrow heads indicate the posterior end of muscle cells in (A), (B), and (C).  
863 Left- or right-pointing yellow arrowheads indicate anterior or posterior extremity of muscle cells,  
864 respectively. Scale bars, 20  $\mu$ m.

865



866 **SUPPLEMENTARY FIGURE LEGENDS**

867

868 **Figure S1. Genetic suppression of a TWK-28 L210T gain-of-function mutant by**  
869 **mutations in *dys-1* and *islo-1***

870 (A) Two-pore domain potassium channels TWK-12 and TWK-43 are enriched in muscle arms  
871 and on the lateral membrane of muscle cells.

872 (B) Current–voltage relationships obtained at pH 7.4 in *X. laevis* oocytes after injection of  
873 cRNA encoding TWK-28 wild-type (black squares) and TWK-28 L210T TM2.6 mutant channels  
874 (red squares). Inset shows leftward shift of reversal potential in TWK-28 L210T. n=8 and n=7  
875 for wild-type and TWK-28 L210T, respectively.

876 (C) Low and high magnification micrographs illustrating reduced locomotion and relaxed body  
877 posture of *twk-28(L210T)* gain-of-function mutants on NGM plates.

878 (D) Loss-of-function mutations in *dys-1* and a missense mutation in *islo-1* suppress paralysis  
879 of the TWK-28 L210T gain-of-function mutation.

880 (E) TWK-28 surface expression is unchanged in sarcoglycan single or triple null mutants.

881 (F) Quantification of TWK-28-associated fluorescence. Mann-Whitney test; n.s., not  
882 significant.

883 Scale bar, 20  $\mu$ m

884

885 **Figure S2. Dystrophin is required for sarcolemmal localization of dystroglycan and**  
886 **sarcoglycans.**

887 (A), (B) Sarcoglycans SGCA-1 and SGN-1 are colocalized with SGCB-1.

888 (C) Subunit interdependence for surface expression of SGCA-1, SGCB-1 and SGN-1.

889 (D) SGBC-1 localization is disrupted differently in *dys-1* and *dyb-1* mutants.

890 (E) Reduction in surface expression and mislocalization of DGN-1 in *perlecan/unc-52* loss of  
891 function mutants.

892 (F) DGN-1 localization is dependent on DYS-1, but not DYB-1.

893 Scale bars, 20  $\mu$ m.

894

895 **Figure S3. Relative localization of DAPC component in *C. elegans* head muscles**

896 (A) Colocalization of DGN-1 and STN-2.

897 (B) Colocalization of SGCB-1 and DYB-1.

898 (C) Colocalization of SGCB-1 and STN-1.

899 (D) Colocalization of DGN-1 and DYB-1.

900 (E) Colocalization of STN-1 and STN-2.

901 Muscle cell outlines are indicated with yellow dashed lines. Scale bars, 20  $\mu$ m.

902

903 **Figure S4. DAPC components partition to dystroglycan- or sarcoglycan-containing**  
904 **membrane compartments**

905 (A) Colocalization of DGN-1 and DYS-1.

906 (B) Colocalization of DGN-1 and STN-2.

907 (C) Colocalization of SGCB-1 and DYB-1.

908 (D) Colocalization of SGCB-1 and STN-1.

909 (E) Colocalization of DGN-1 and DYB-1.

910 (F) Colocalization of SGCB-1 and DYS-1.

911 (G) Colocalization of STN-1 and STN-2.

912 *Anterior domain*, comet-like domain at anterior tip of muscle cells; *Posterior domain*, punctate  
913 clustered pattern in posterior part of muscle cells.

914

915 **Figure S5. TWK-28 colocalizes with all DAPC components**

916 Colocalization of TWK-28 with SGCB-1, STN-1, DYB-1, DGN-1, DYS-1 and STN-2. Rightmost  
917 column, magnified view of anterior region of individual muscle cells.

918 Scale bars, 20  $\mu$ m.

919

920

921 **Figure S6. EGL-20/Wnt is required for muscle cell polarity while several Wnt ligands and  
922 receptors are not**

923 (A), (B) Wnt ligands (*cwn-1*, *cwn-2*, *lin-44*), frizzled receptors (*lin-17*, *mig-1*, *cfz-2*) and the  
924 tyrosine kinase-related receptors LIN-18/Ryk are not required for TWK-28 planar polarization.

925 (C) *egl-20(bln916)* –an early nonsense mutation at position Pro21– disrupts TWK-28  
926 localization in posterior midbody muscles.

927 Scale bars, 20  $\mu$ m.

928

929 **Figure S7. The localization of DSH-1 is dependent on CAM-1 and EGL-20**

930 (A) Enrichment of DSH-1 at the posterior end of muscle cells is lost in *cam-1* and *egl-20*  
931 mutants. DSH-1 localization is however conserved in the anterior midbody of *egl-20* mutants,  
932 consistent with the posteriorly-restricted distribution of EGL-20. White arrow heads indicate  
933 DSH-1 enrichment at the posterior end of muscle cells. Ventral view.

934 (B) Life-long degradation of DSH-1-AID-mNeonGreen using an ubiquitous TIR1-expressing  
935 transgene disrupts asymmetric localization of TWK-28 in muscle cells.

936 Scale bars, 20  $\mu$ m.

937

938  
939  
940

## REFERENCES

- 941 1. Bennett, V., and Lorenzo, D.N. (2016). An Adaptable Spectrin/Ankyrin-Based Mechanism for Long-  
942 Range Organization of Plasma Membranes in Vertebrate Tissues. *Current topics in membranes* 77,  
943 143–184. [10.1016/bs.ctm.2015.10.001](https://doi.org/10.1016/bs.ctm.2015.10.001).
- 944 2. Bennett, V., and Lorenzo, D.N. (2013). Spectrin- and ankyrin-based membrane domains and the  
945 evolution of vertebrates. *Current topics in membranes* 72, 1–37. [10.1016/b978-0-12-417027-8.00001-](https://doi.org/10.1016/b978-0-12-417027-8.00001-5)  
946 5.
- 947 3. Connors, N.C., Adams, M.E., Froehner, S.C., and Kofuji, P. (2004). The Potassium Channel Kir4.1  
948 Associates with the Dystrophin-Glycoprotein Complex via  $\alpha$ -Syntrophin in Glia\*. *J Biol Chem* 279,  
949 28387–28392. [10.1074/jbc.m402604200](https://doi.org/10.1074/jbc.m402604200).
- 950 4. Gavillet, B., Rougier, J.-S., Domenighetti, A.A., Behar, R., Boixel, C., Ruchat, P., Lehr, H.-A.,  
951 Pedrazzini, T., and Abriel, H. (2006). Cardiac Sodium Channel Nav1.5 Is Regulated by a Multiprotein  
952 Complex Composed of Syntrophins and Dystrophin. *Circ Res* 99, 407–414.  
953 [10.1161/01.res.0000237466.13252.5e](https://doi.org/10.1161/01.res.0000237466.13252.5e).
- 954 5. Lai, H.C., and Jan, L.Y. (2006). The distribution and targeting of neuronal voltage-gated ion  
955 channels. *Nat Rev Neurosci* 7, 548–562. [10.1038/nrn1938](https://doi.org/10.1038/nrn1938).
- 956 6. Yang, Y., and Mlodzik, M. (2015). Wnt-Frizzled/Planar Cell Polarity Signaling: Cellular Orientation  
957 by Facing the Wind (Wnt). *Annu Rev Cell Dev Bi* 31, 623–646. [10.1146/annurev-cellbio-100814-](https://doi.org/10.1146/annurev-cellbio-100814-125315)  
958 125315.
- 959 7. Gieseler, K., Qadota, H., and Benian, G.M. (2017). Development, structure, and maintenance of *C.*  
960 *elegans* body wall muscle.
- 961 8. Mizumoto, K., Jin, Y., and Bessereau, J.-L. (2023). Synaptogenesis: unmasking molecular  
962 mechanisms using *Caenorhabditis elegans*. *Genetics* 223. [10.1093/genetics/iyac176](https://doi.org/10.1093/genetics/iyac176).
- 963 9. Kim, H., Pierce-Shimomura, J.T., Oh, H.J., Johnson, B.E., Goodman, M.B., and McIntire, S.L.  
964 (2009). The Dystrophin Complex Controls BK Channel Localization and Muscle Activity in  
965 *Caenorhabditis elegans*. *Plos Genet* 5, e1000780. [10.1371/journal.pgen.1000780](https://doi.org/10.1371/journal.pgen.1000780).
- 966 10. Sancar, F., Touroutine, D., Gao, S., Oh, H.J., Gendrel, M., Bessereau, J.-L., Kim, H., Zhen, M.,  
967 and Richmond, J.E. (2011). The dystrophin-associated protein complex maintains muscle excitability  
968 by regulating Ca(2+)-dependent K(+) (BK) channel localization. *Journal of Biological Chemistry* 286,  
969 33501–33510. [10.1074/jbc.m111.227678](https://doi.org/10.1074/jbc.m111.227678).
- 970 11. Cao, J., Packer, J.S., Ramani, V., Cusanovich, D.A., Huynh, C., Daza, R., Qiu, X., Lee, C., Furlan,  
971 S.N., Steemers, F.J., et al. (2017). Comprehensive single-cell transcriptional profiling of a multicellular  
972 organism. *Science* 357, 661–667. [10.1126/science.aam8940](https://doi.org/10.1126/science.aam8940).
- 973 12. Vigne, P., Gimond, C., Ferrari, C., Vielle, A., Hallin, J., Pino-Querido, A., El Mouridi, S, Frøkjær-  
974 Jensen, C., Boulin, T., Teotónio, H., et al. (2020). A single nucleotide change underlies the genetic  
975 assimilation of a plastic trait. *bioRxiv*, 2020.06.29.176990.
- 976 13. Kunkel, M.T., Johnstone, D.B., Thomas, J.H., and Salkoff, L. (2000). Mutants of a temperature-  
977 sensitive two-P domain potassium channel. *The Journal of neuroscience : the official journal of the*  
978 *Society for Neuroscience* 20, 7517–7524.
- 979 14. Cruz, I.P. de la, Levin, J.Z., Cummins, C., Anderson, P., and Horvitz, H.R. (2003). sup-9, sup-10,  
980 and unc-93 may encode components of a two-pore K<sup>+</sup> channel that coordinates muscle contraction in  
981 *Caenorhabditis elegans*. *Journal of Neuroscience* 23, 9133–9145.
- 982 15. El Mouridi, S., Lecroisey, C., Tardy, P., Mercier, M., Leclercq-Blondel, A., Zariohi, N., and Boulin,  
983 T. (2017). Reliable CRISPR/Cas9 Genome Engineering in *Caenorhabditis elegans* Using a Single  
984 Efficient sgRNA and an Easily Recognizable Phenotype. *G3 Genes Genomes Genetics* 7, 1429–1437.  
985 [10.1534/g3.117.040824](https://doi.org/10.1534/g3.117.040824).
- 986 16. Oh, K.H., Haney, J.J., Wang, X., Chuang, C.-F., Richmond, J.E., and Kim, H. (2017). ERG-28  
987 controls BK channel trafficking in the ER to regulate synaptic function and alcohol response in *C.*  
988 *elegans*. *eLife* 6, e1001077. [10.7554/elife.24733](https://doi.org/10.7554/elife.24733).
- 989 17. Taylor, S.R., Santpere, G., Weinreb, A., Barrett, A., Reilly, M.B., Xu, C., Varol, E., Oikonomou, P.,  
990 Glenwinkel, L., McWhirter, R., et al. (2021). Molecular topography of an entire nervous system. *Cell*  
991 184, 4329–4347.e23. [10.1016/j.cell.2021.06.023](https://doi.org/10.1016/j.cell.2021.06.023).
- 992 18. Carre-Pierrat, M., Grisoni, K., Gieseler, K., Mariol, M.-C., Martin, E., Jospin, M., Allard, B., and  
993 Ségalat, L. (2006). The SLO-1 BK channel of *Caenorhabditis elegans* is critical for muscle function

- 994 and is involved in dystrophin-dependent muscle dystrophy. *J Mol Biol* 358, 387–395.  
995 10.1016/j.jmb.2006.02.037.
- 996 19. Kim, H., Pierce-Shimomura, J.T., Oh, H.J., Johnson, B.E., Goodman, M.B., and McIntire, S.L.  
997 (2009). The dystrophin complex controls bk channel localization and muscle activity in *Caenorhabditis*  
998 *elegans*. *PLoS Genetics* 5, e1000780. 10.1371/journal.pgen.1000780.
- 999 20. Ben Soussia, I., El Mouridi, S., Kang, D., Leclercq-Blondel, A., Khoubza, L., Tardy, P., Zariohi, N.,  
1000 Gendrel, M., Lesage, F., Kim, E.-J., et al. (2019). Mutation of a single residue promotes gating of  
1001 vertebrate and invertebrate two-pore domain potassium channels. *Nature communications* 10, 787.  
1002 10.1038/s41467-019-08710-3.
- 1003 21. Hui, S., Xing, X., and Bader, G.D. (2013). Predicting PDZ domain mediated protein interactions  
1004 from structure. *Bmc Bioinformatics* 14, 27. 10.1186/1471-2105-14-27.
- 1005 22. Zhang, L., Ward, J.D., Cheng, Z., and Dernburg, A.F. (2015). The auxin-inducible degradation  
1006 (AID) system enables versatile conditional protein depletion in *C. elegans*. *Development* 142, 4374–  
1007 4384. 10.1242/dev.129635.
- 1008 23. Grisoni, K., Martin, E., Gieseler, K., Mariol, M.-C., and Ségalat, L. (2002). Genetic evidence for a  
1009 dystrophin-glycoprotein complex (DGC) in *Caenorhabditis elegans*. *Gene* 294, 77–86. 10.1016/s0378-  
1010 1119(02)00762-x.
- 1011 24. Johnson, R.P., Kang, S.H., and Kramer, J.M. (2006). *C. elegans* dystroglycan DGN-1 functions in  
1012 epithelia and neurons, but not muscle, and independently of dystrophin. *Development* 133, 1911–  
1013 1921. 10.1242/dev.02363.
- 1014 25. Keeley, D.P., Hastie, E., Jayadev, R., Kelley, L.C., Chi, Q., Payne, S.G., Jeger, J.L., Hoffman,  
1015 B.D., and Sherwood, D.R. (2020). Comprehensive Endogenous Tagging of Basement Membrane  
1016 Components Reveals Dynamic Movement within the Matrix Scaffolding. *Dev Cell* 54, 60-74.e7.  
1017 10.1016/j.devcel.2020.05.022.
- 1018 26. Holt, K.H., and Campbell, K.P. (1998). Assembly of the Sarcoglycan Complex INSIGHTS FOR  
1019 MUSCULAR DYSTROPHY\*. *J Biol Chem* 273, 34667–34670. 10.1074/jbc.273.52.34667.
- 1020 27. Talts, J.F., Andac, Z., Göhring, W., Brancaccio, A., and Timpl, R. (1999). Binding of the G domains  
1021 of laminin  $\alpha 1$  and  $\alpha 2$  chains and perlecan to heparin, sulfatides,  $\alpha$ -dystroglycan and several  
1022 extracellular matrix proteins. *Embo J* 18, 863–870. 10.1093/emboj/18.4.863.
- 1023 28. Ishikawa-Sakurai, M., Yoshida, M., Imamura, M., Davies, K.E., and Ozawa, E. (2004). ZZ domain  
1024 is essentially required for the physiological binding of dystrophin and utrophin to  $\beta$ -dystroglycan. *Hum*  
1025 *Mol Genet* 13, 693–702. 10.1093/hmg/ddh087.
- 1026 29. Chung, W., and Campanelli, J.T. (1999). WW and EF Hand Domains of Dystrophin-Family  
1027 Proteins Mediate Dystroglycan Binding. *Mol Cell Biology Res Commun* 2, 162–171.  
1028 10.1006/mcbr.1999.0168.
- 1029 30. Mullen, G.P., Rogalski, T.M., Bush, J.A., Gorji, P.R., and Moerman, D.G. (1999). Complex  
1030 Patterns of Alternative Splicing Mediate the Spatial and Temporal Distribution of Perlecan/UNC-52 in  
1031 *Caenorhabditis elegans*. *Mol Biol Cell* 10, 3205–3221. 10.1091/mbc.10.10.3205.
- 1032 31. Cravo, J., and Heuvel, S. van den (2020). Tissue polarity and PCP protein function: *C. elegans* as  
1033 an emerging model. *Curr Opin Cell Biol* 62, 159–167. 10.1016/j.ceb.2019.11.004.
- 1034 32. Mlodzik, M. (2016). Chapter Five The Dishevelled Protein Family Still Rather a Mystery After Over  
1035 20 Years of Molecular Studies. *Curr Top Dev Biol* 117, 75–91. 10.1016/bs.ctdb.2015.11.027.
- 1036 33. Pani, A.M., and Goldstein, B. (2018). Direct visualization of a native Wnt in vivo reveals that a  
1037 long-range Wnt gradient forms by extracellular dispersal. *Elife* 7, e38325. 10.7554/elife.38325.
- 1038 34. Coudreuse, D.Y.M., Roël, G., Betist, M.C., Destrée, O., and Korswagen, H.C. (2006). Wnt  
1039 Gradient Formation Requires Retromer Function in Wnt-Producing Cells. *Science* 312, 921–924.  
1040 10.1126/science.1124856.
- 1041 35. Belhasan, D.C., and Akaaboune, M. (2020). The role of the Dystrophin Glycoprotein Complex on  
1042 the Neuromuscular System. *Neurosci Lett* 722, 134833. 10.1016/j.neulet.2020.134833.
- 1043 36. Brouilly, N., Lecroisey, C., Martin, E., Pierson, L., Mariol, M.-C., Qadota, H., Labouesse, M.,  
1044 Streichenberger, N., Mounier, N., and Gieseler, K. (2015). Ultra-structural time-course study in the *C.*  
1045 *elegans* model for Duchenne muscular dystrophy highlights a crucial role for sarcomere-anchoring  
1046 structures and sarcolemma integrity in the earliest steps of the muscle degeneration process. *Hum*  
1047 *Mol Genet* 24, 6428–6445. 10.1093/hmg/ddv353.



## Figure 1

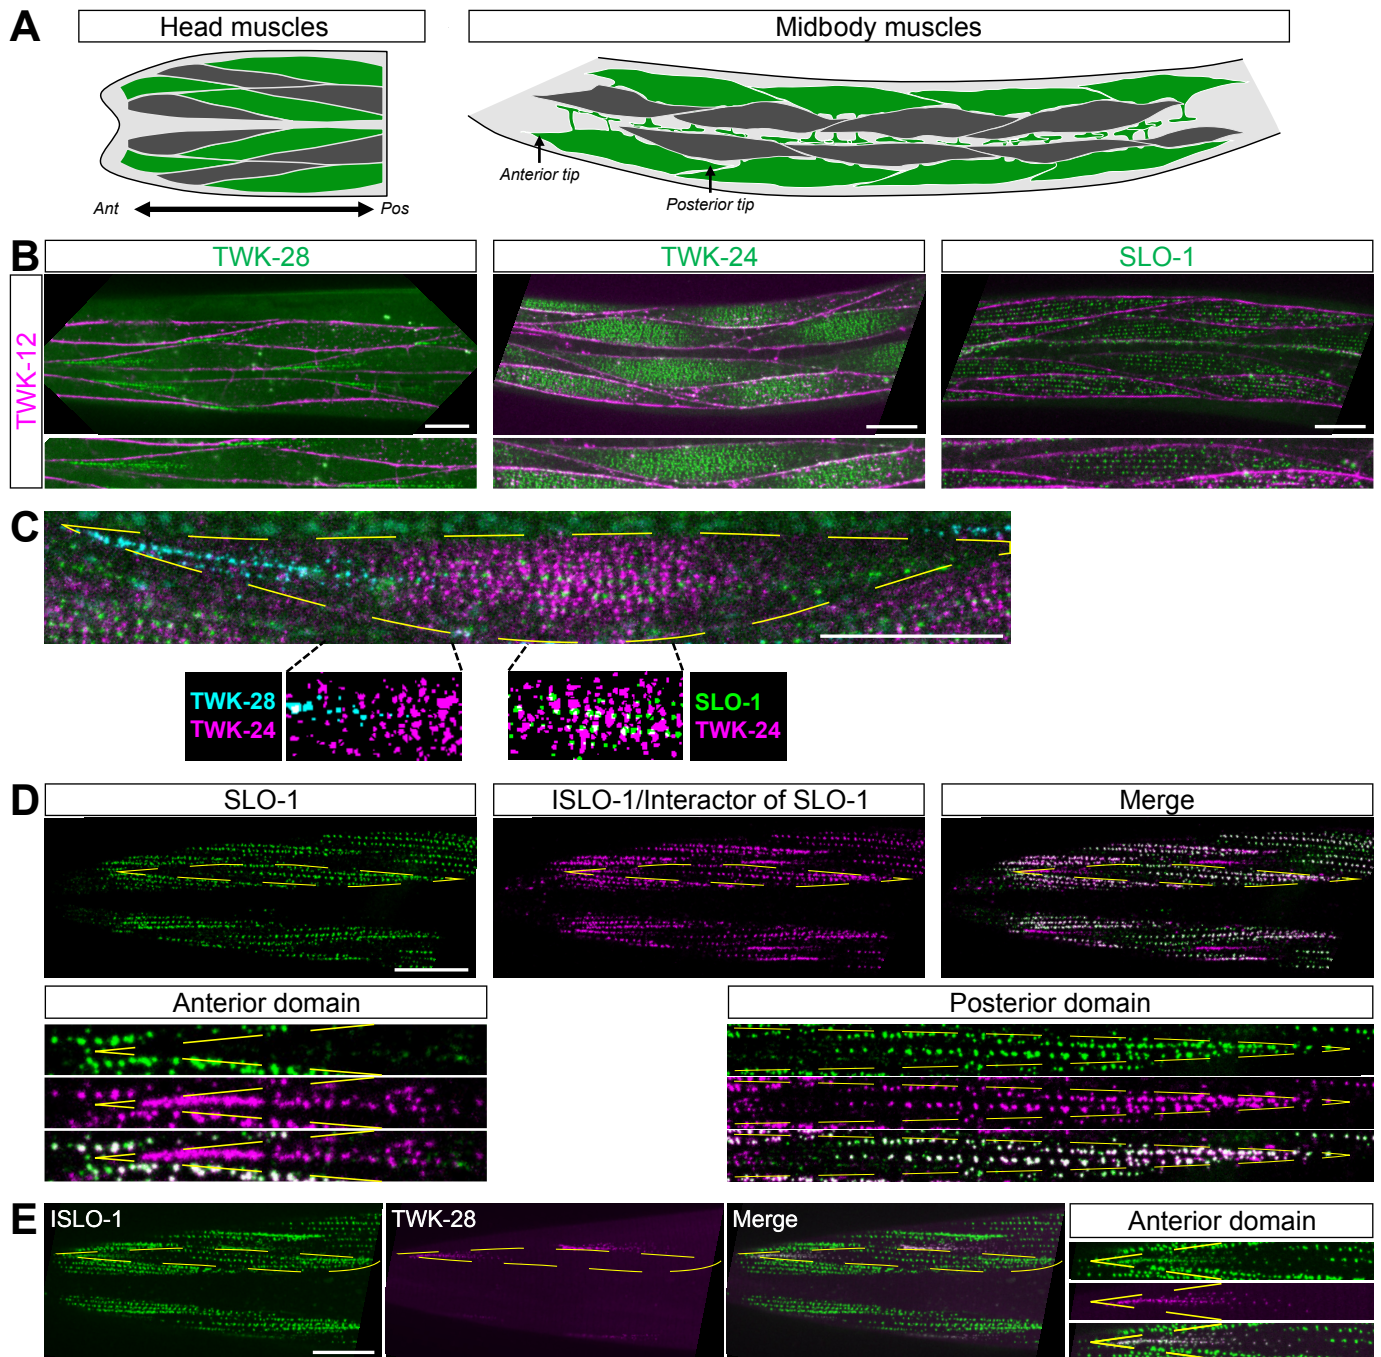



## Figure 2

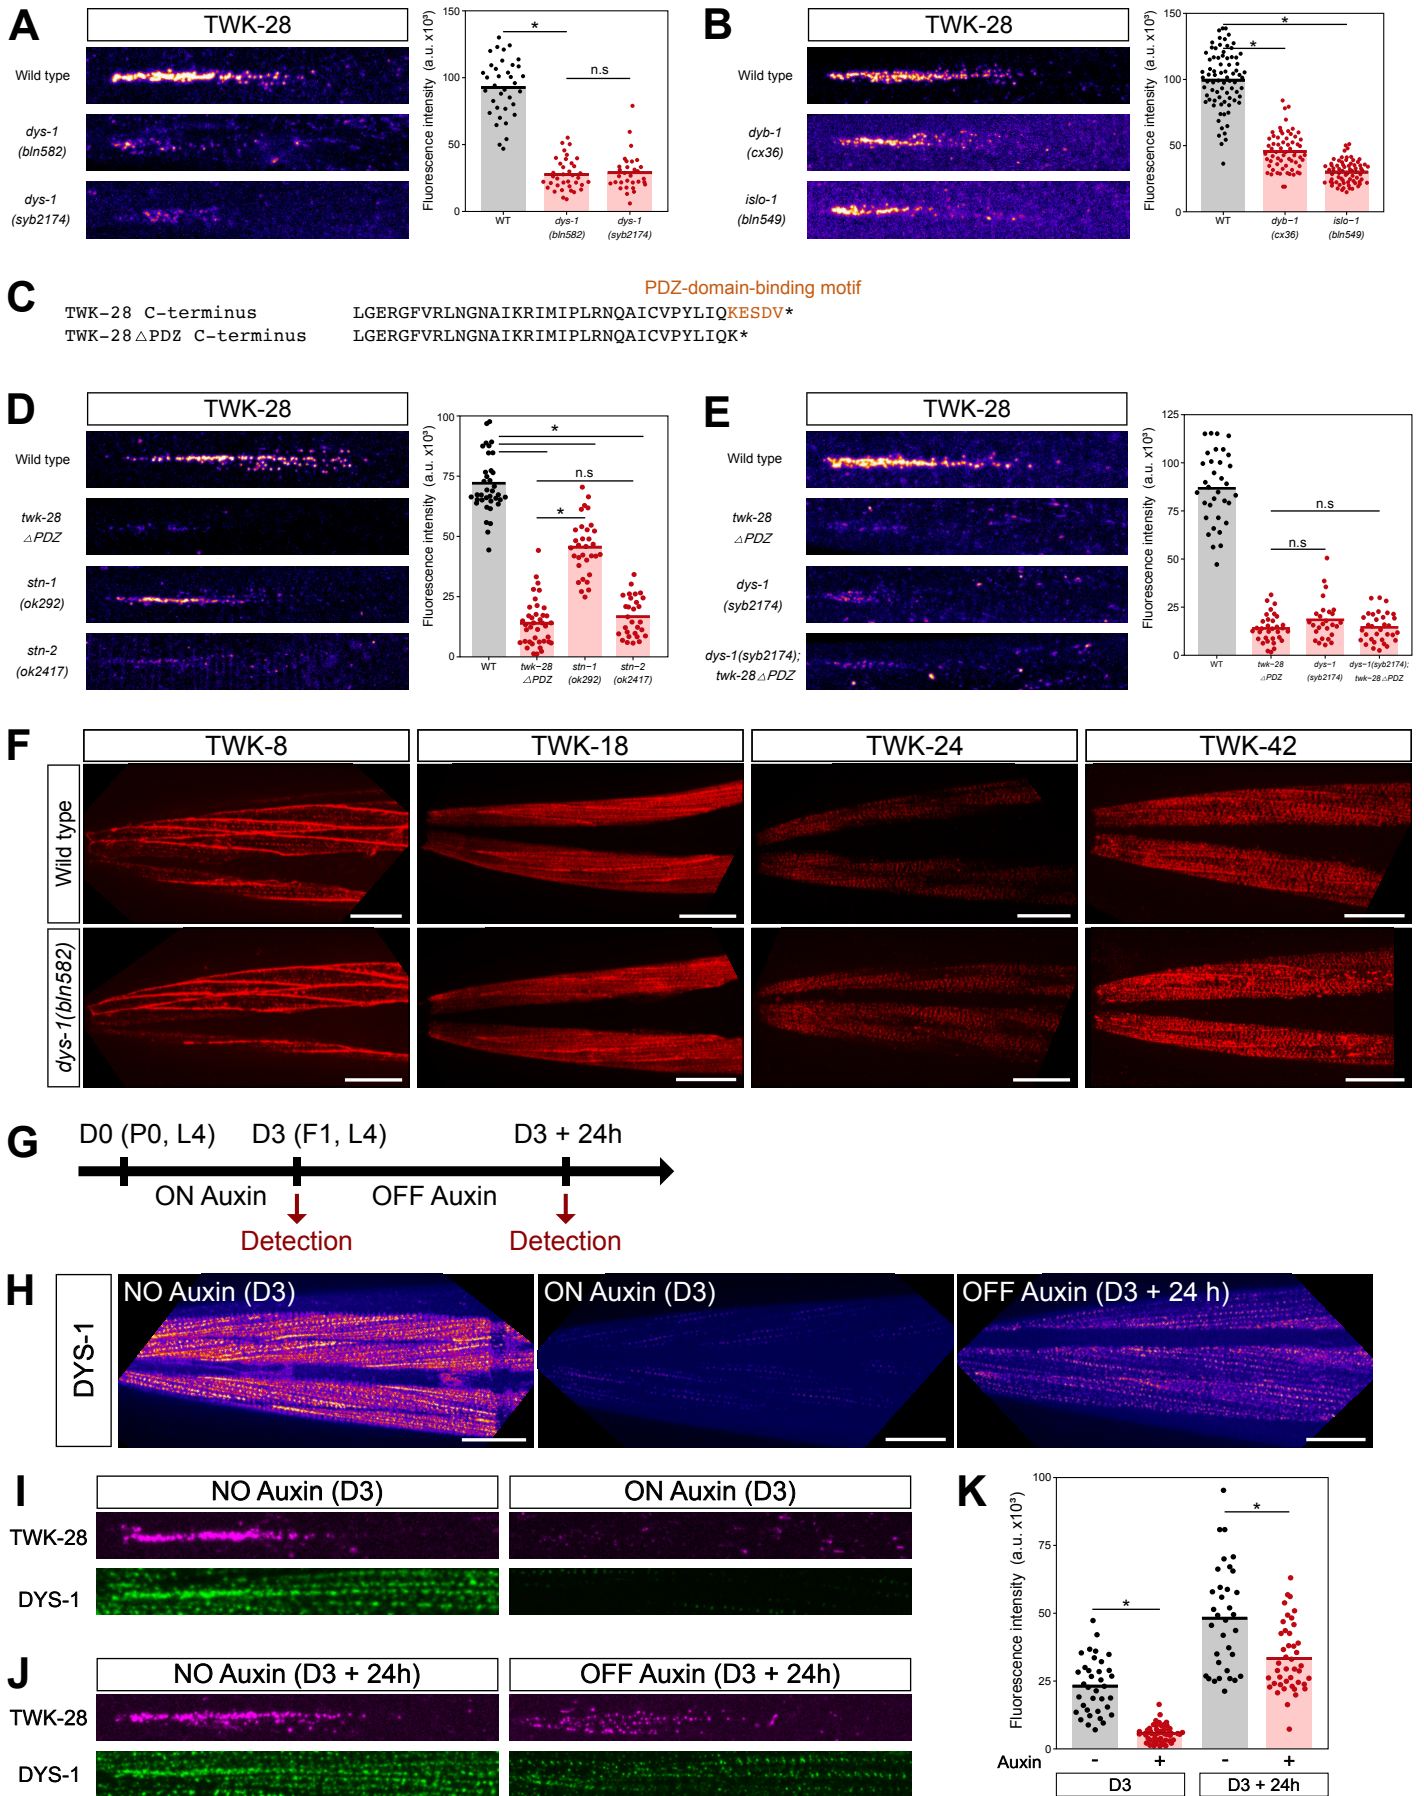

### Figure 3

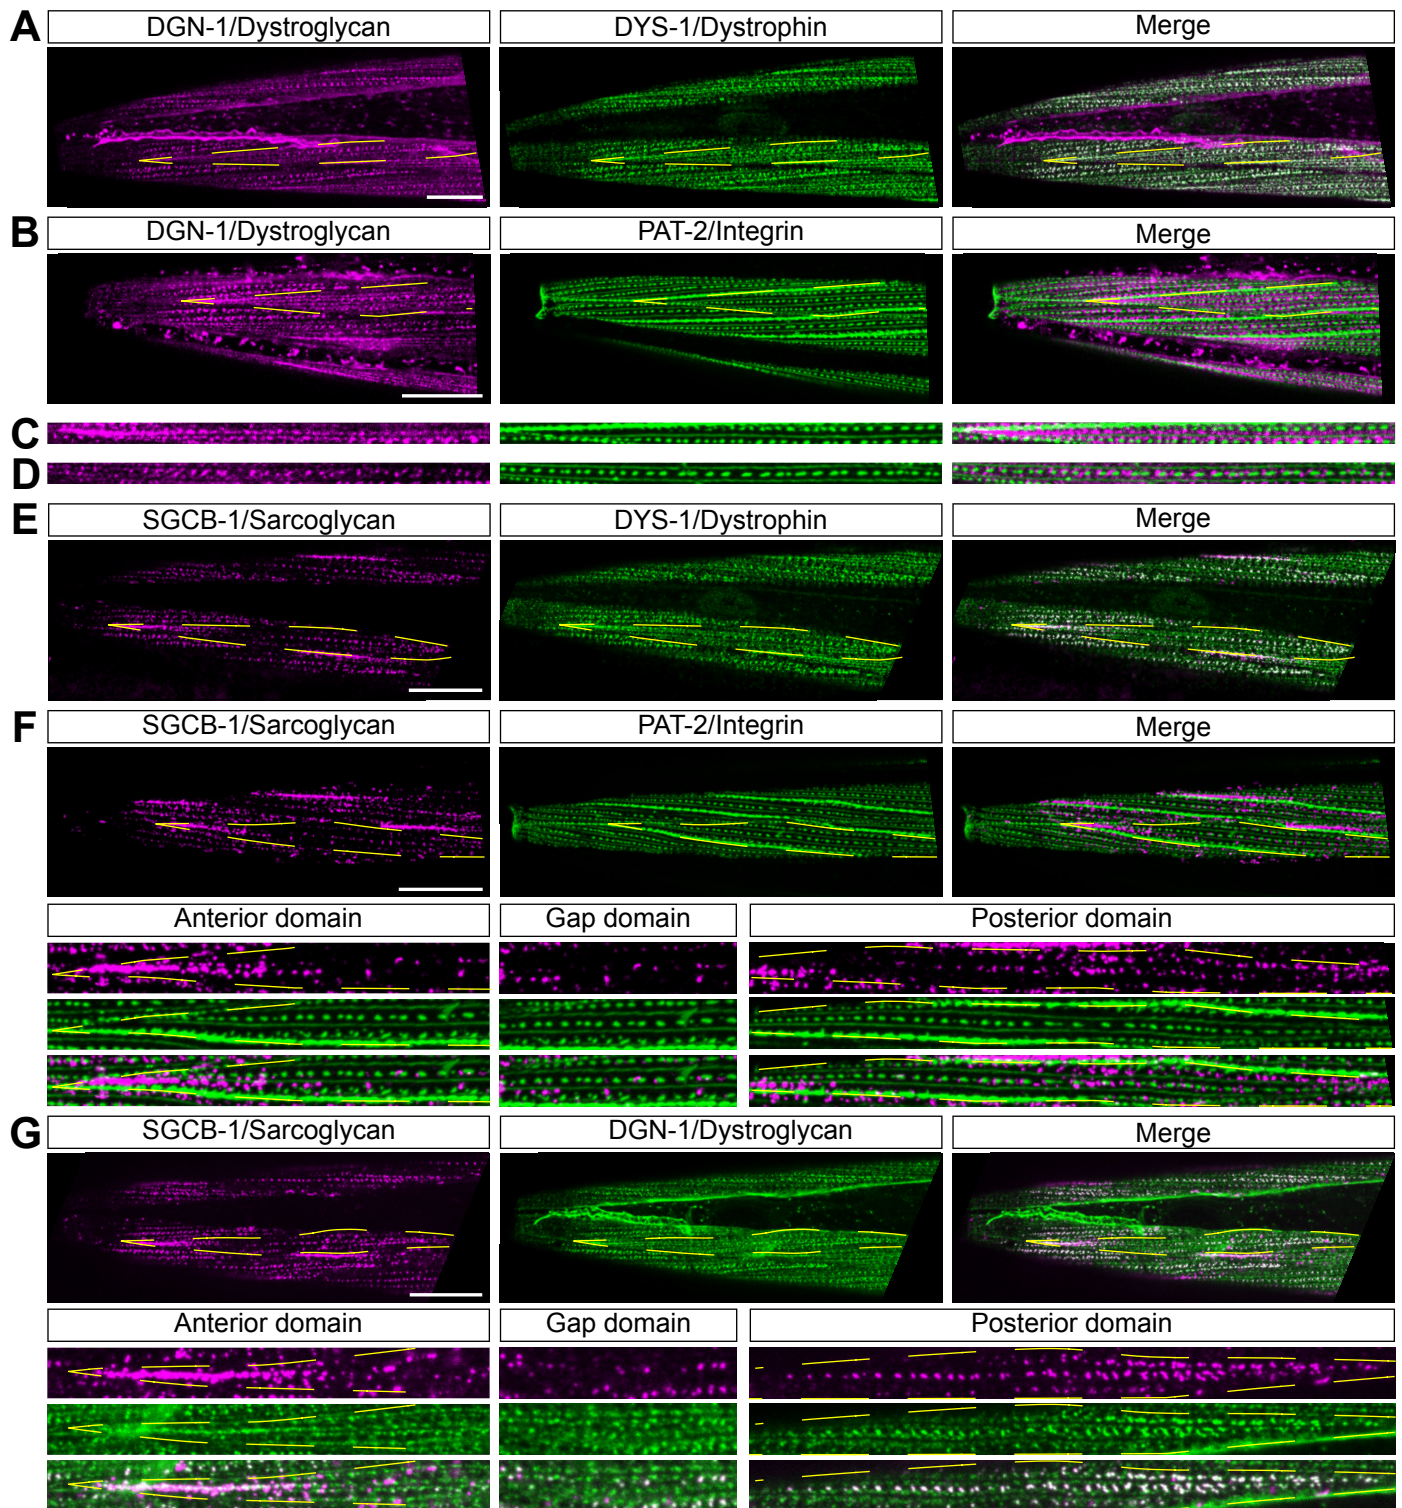



## Figure 4

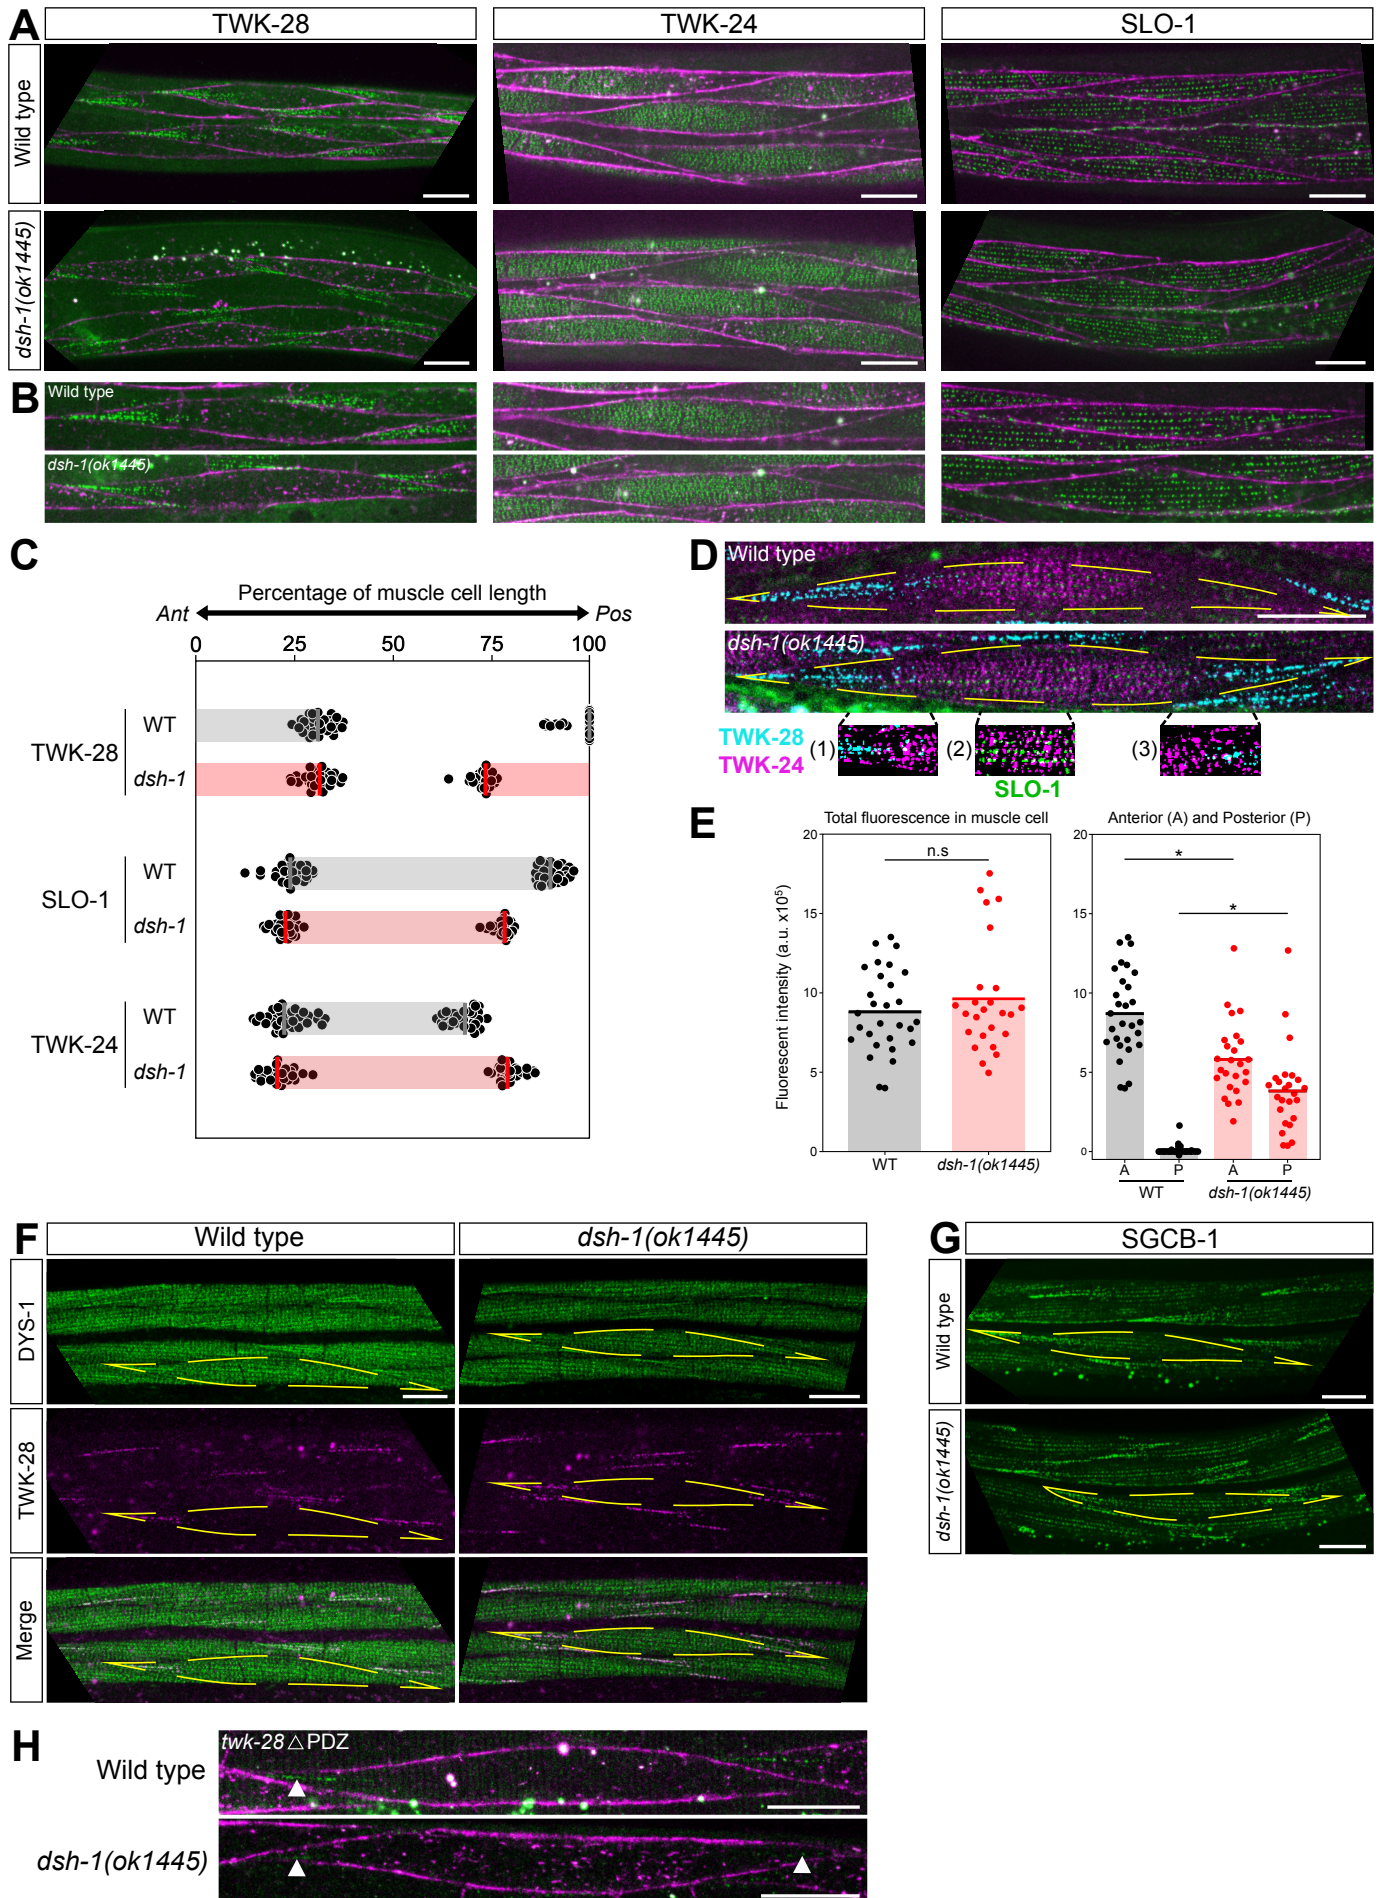

**Figure 5**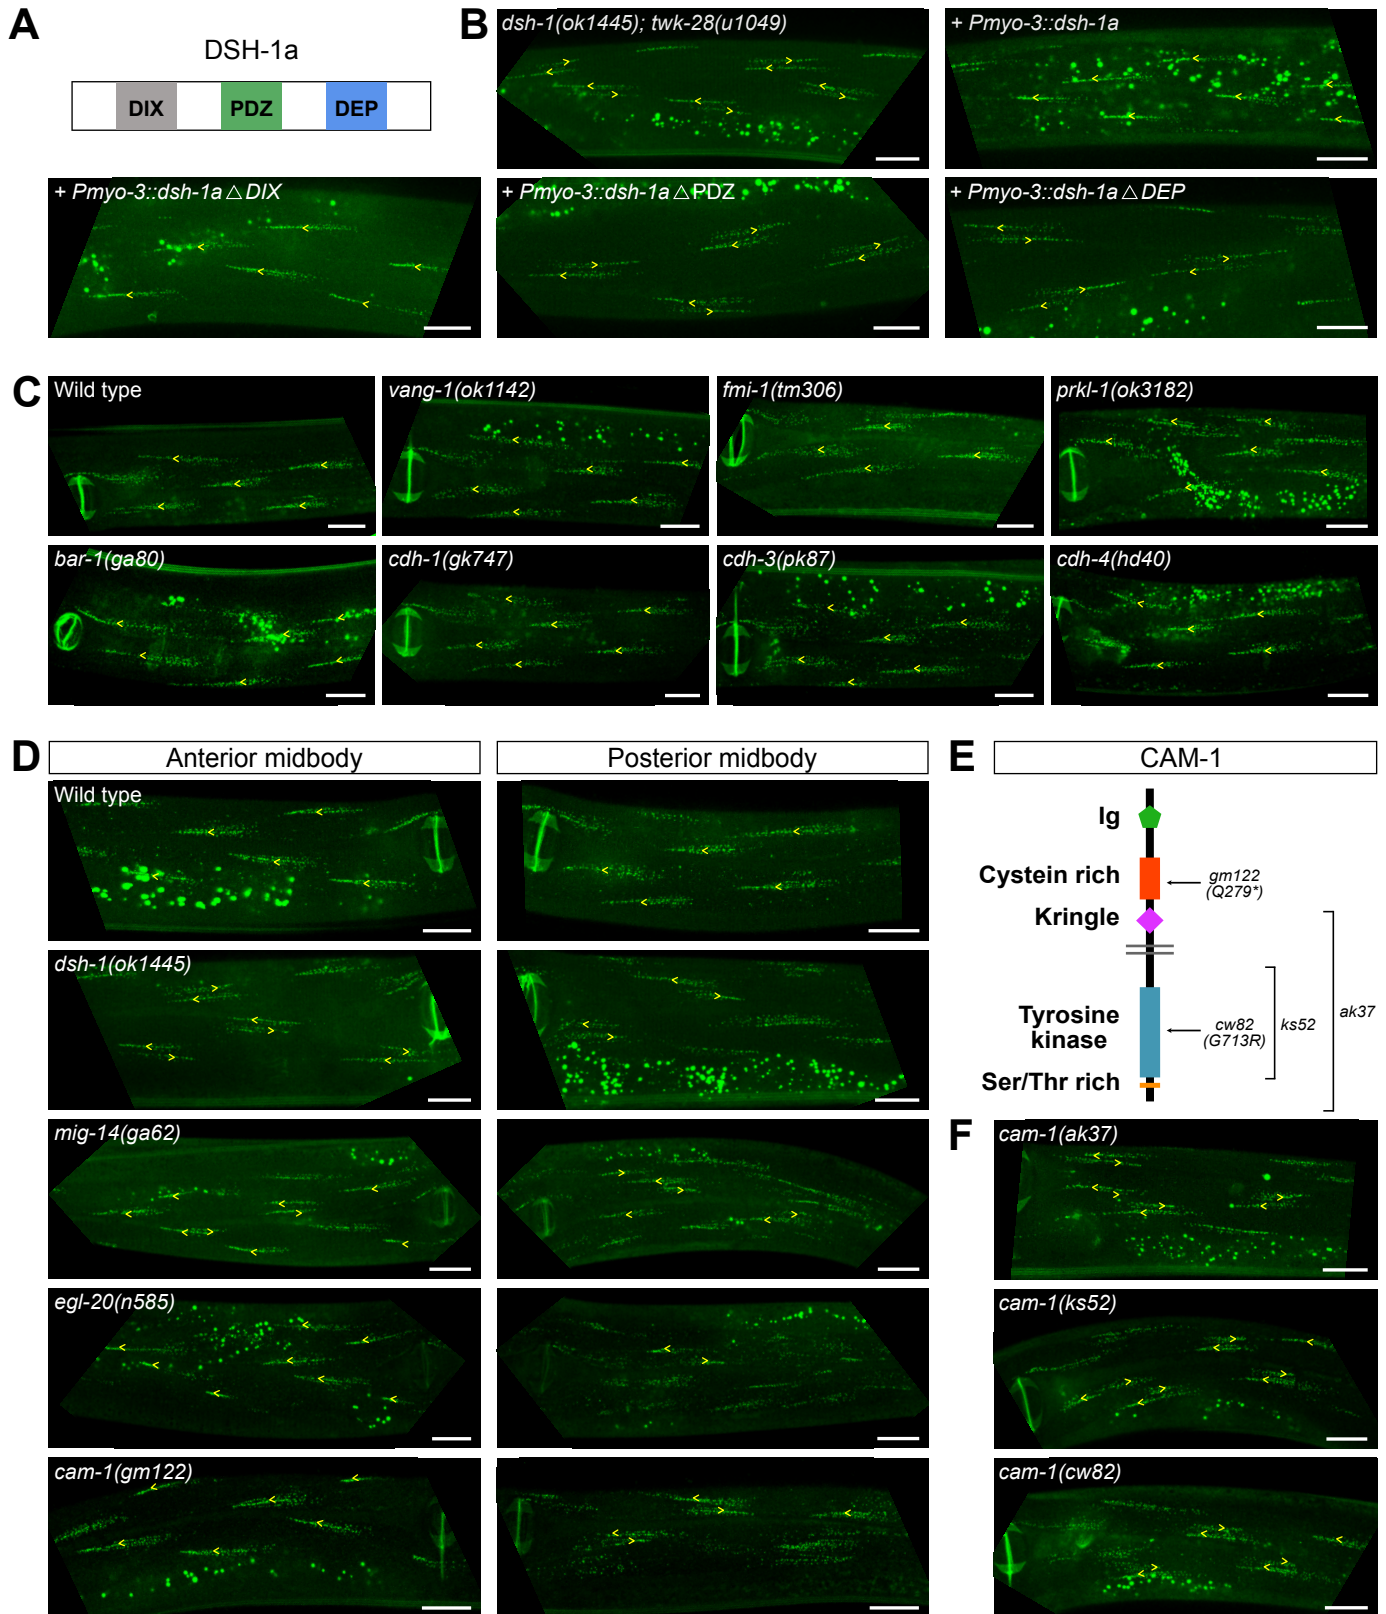



## Figure 6

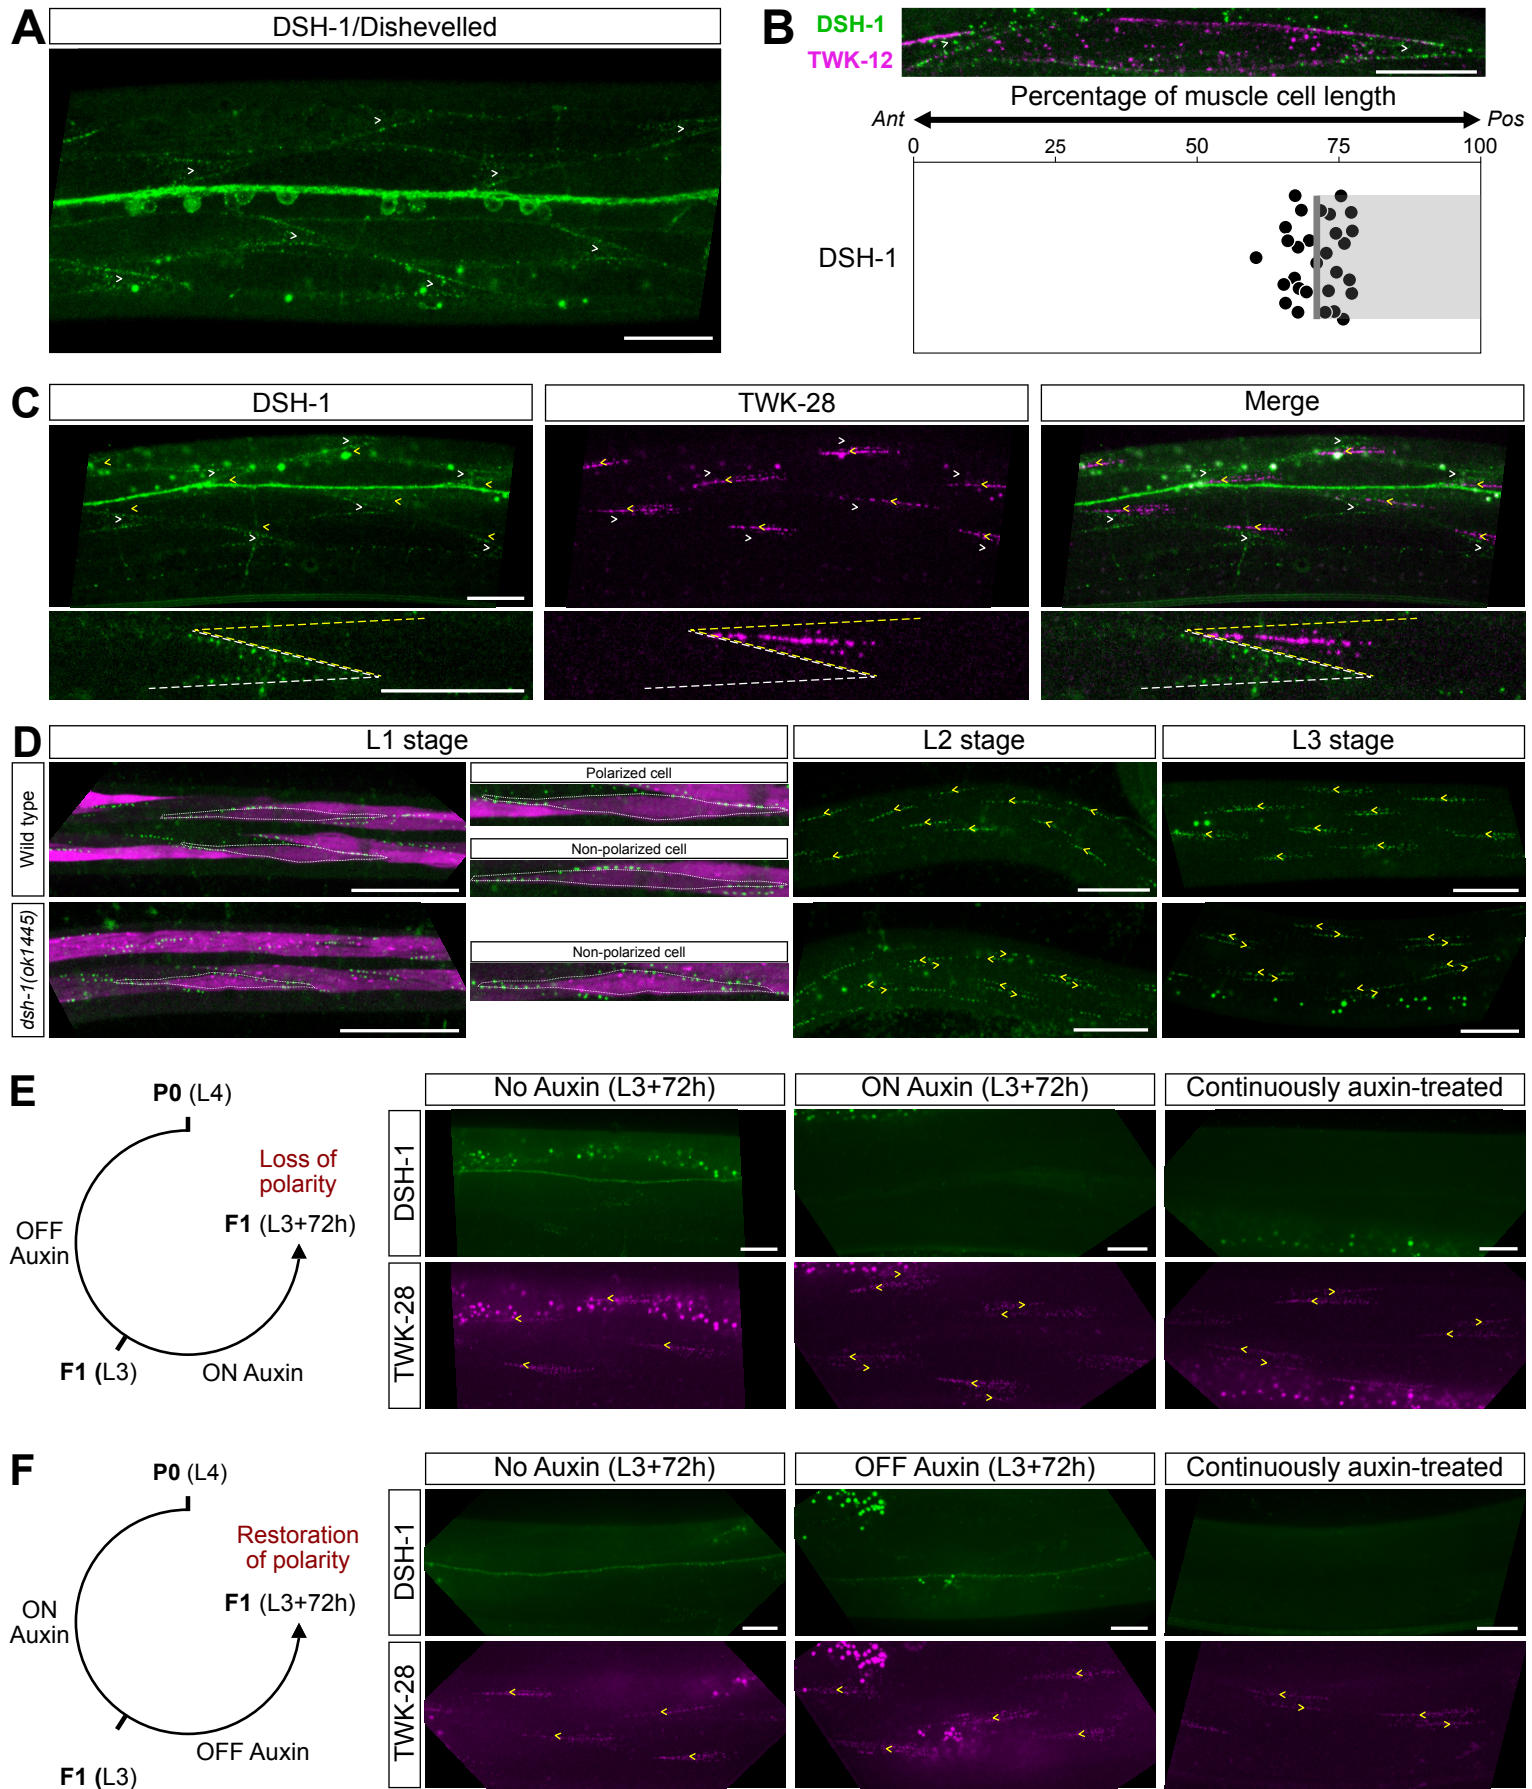



## Figure S1

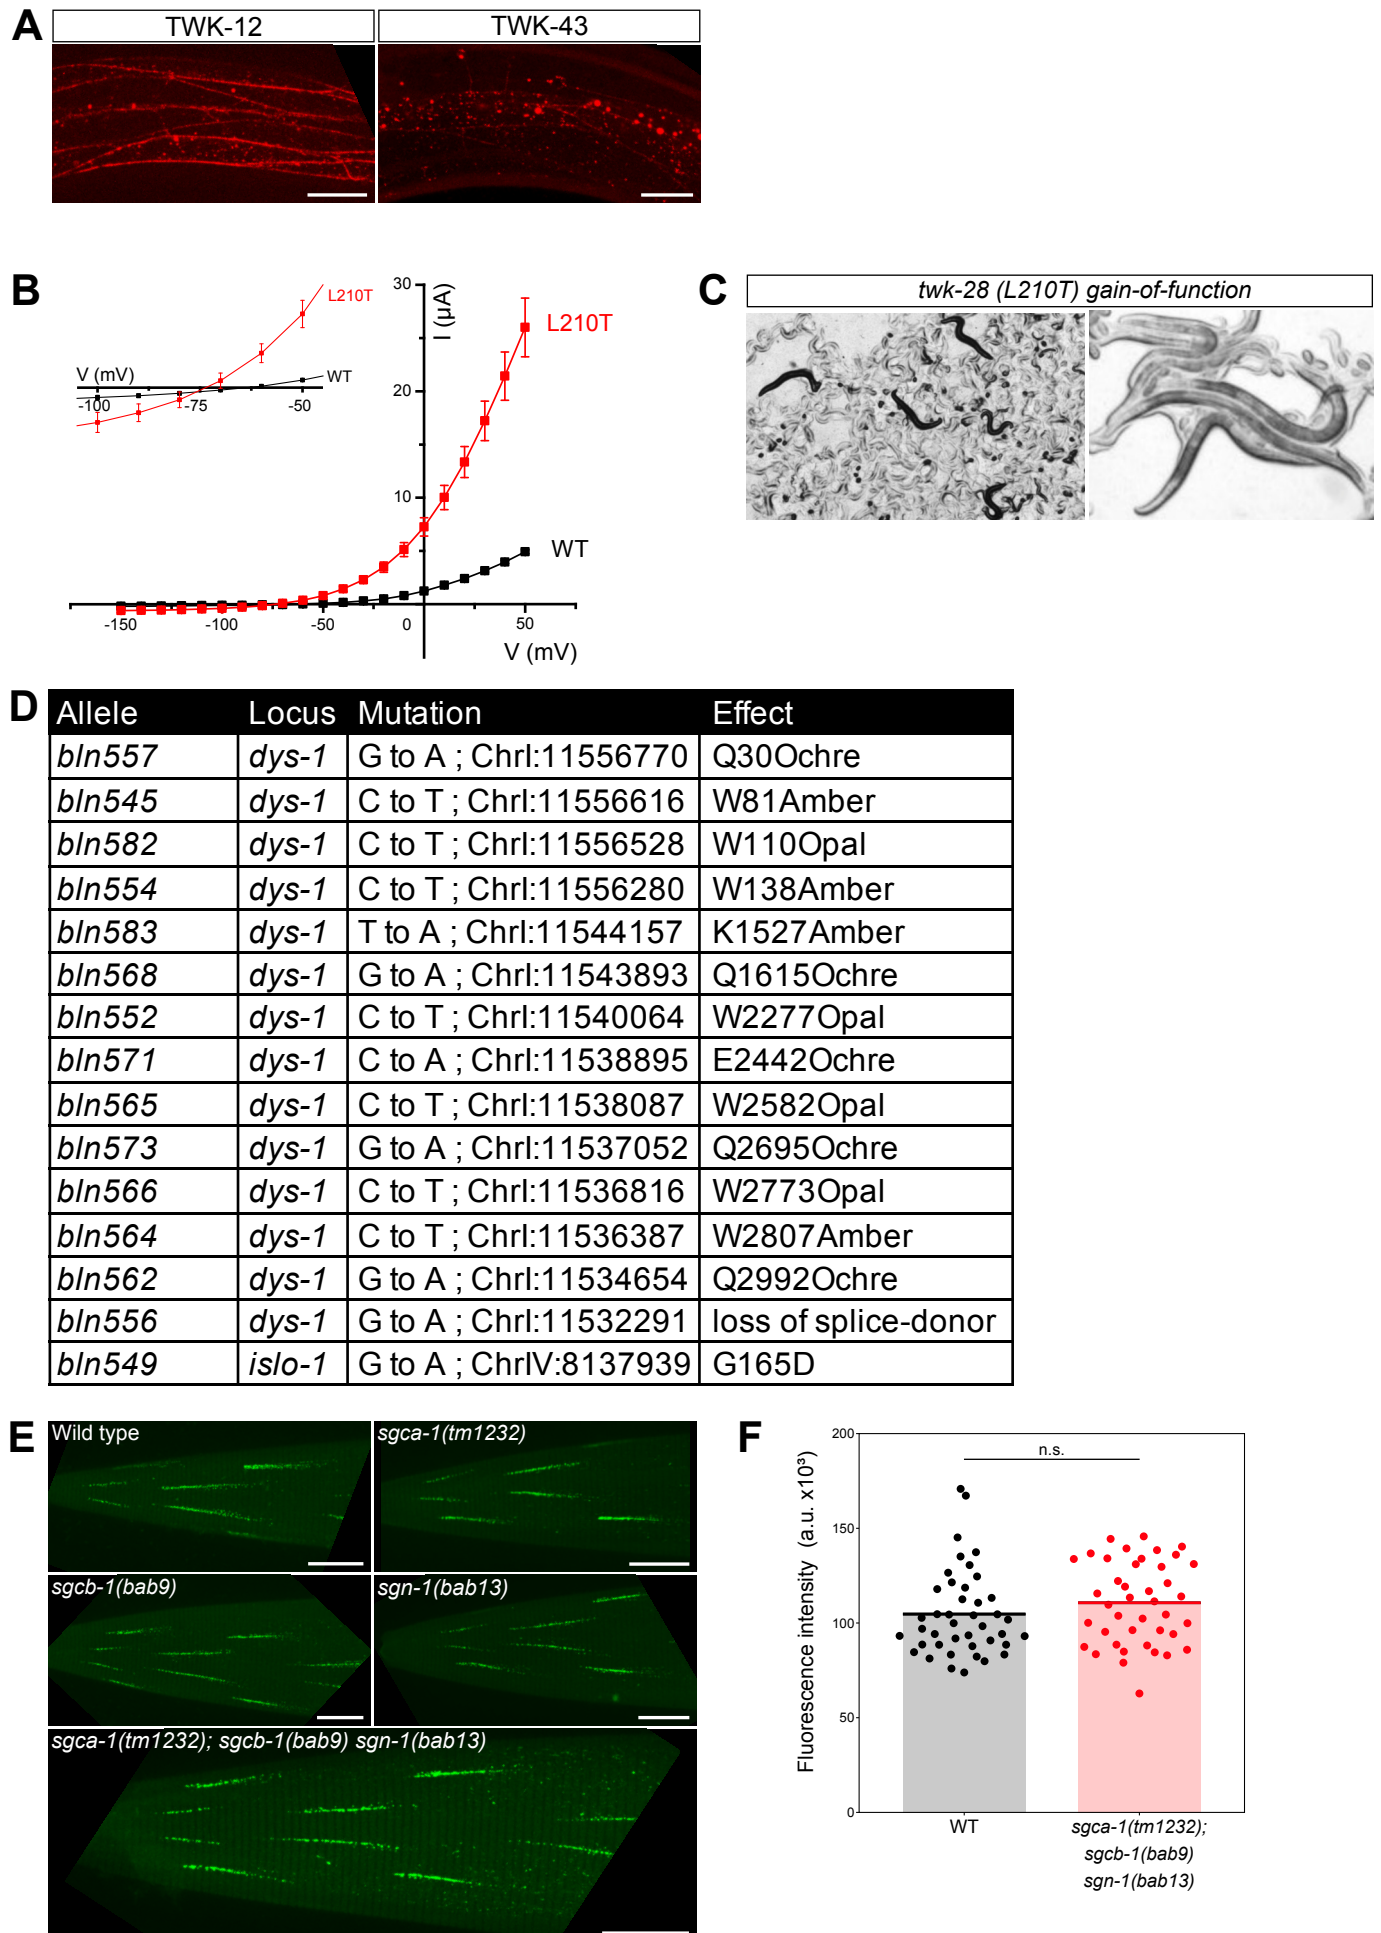

## Figure S2

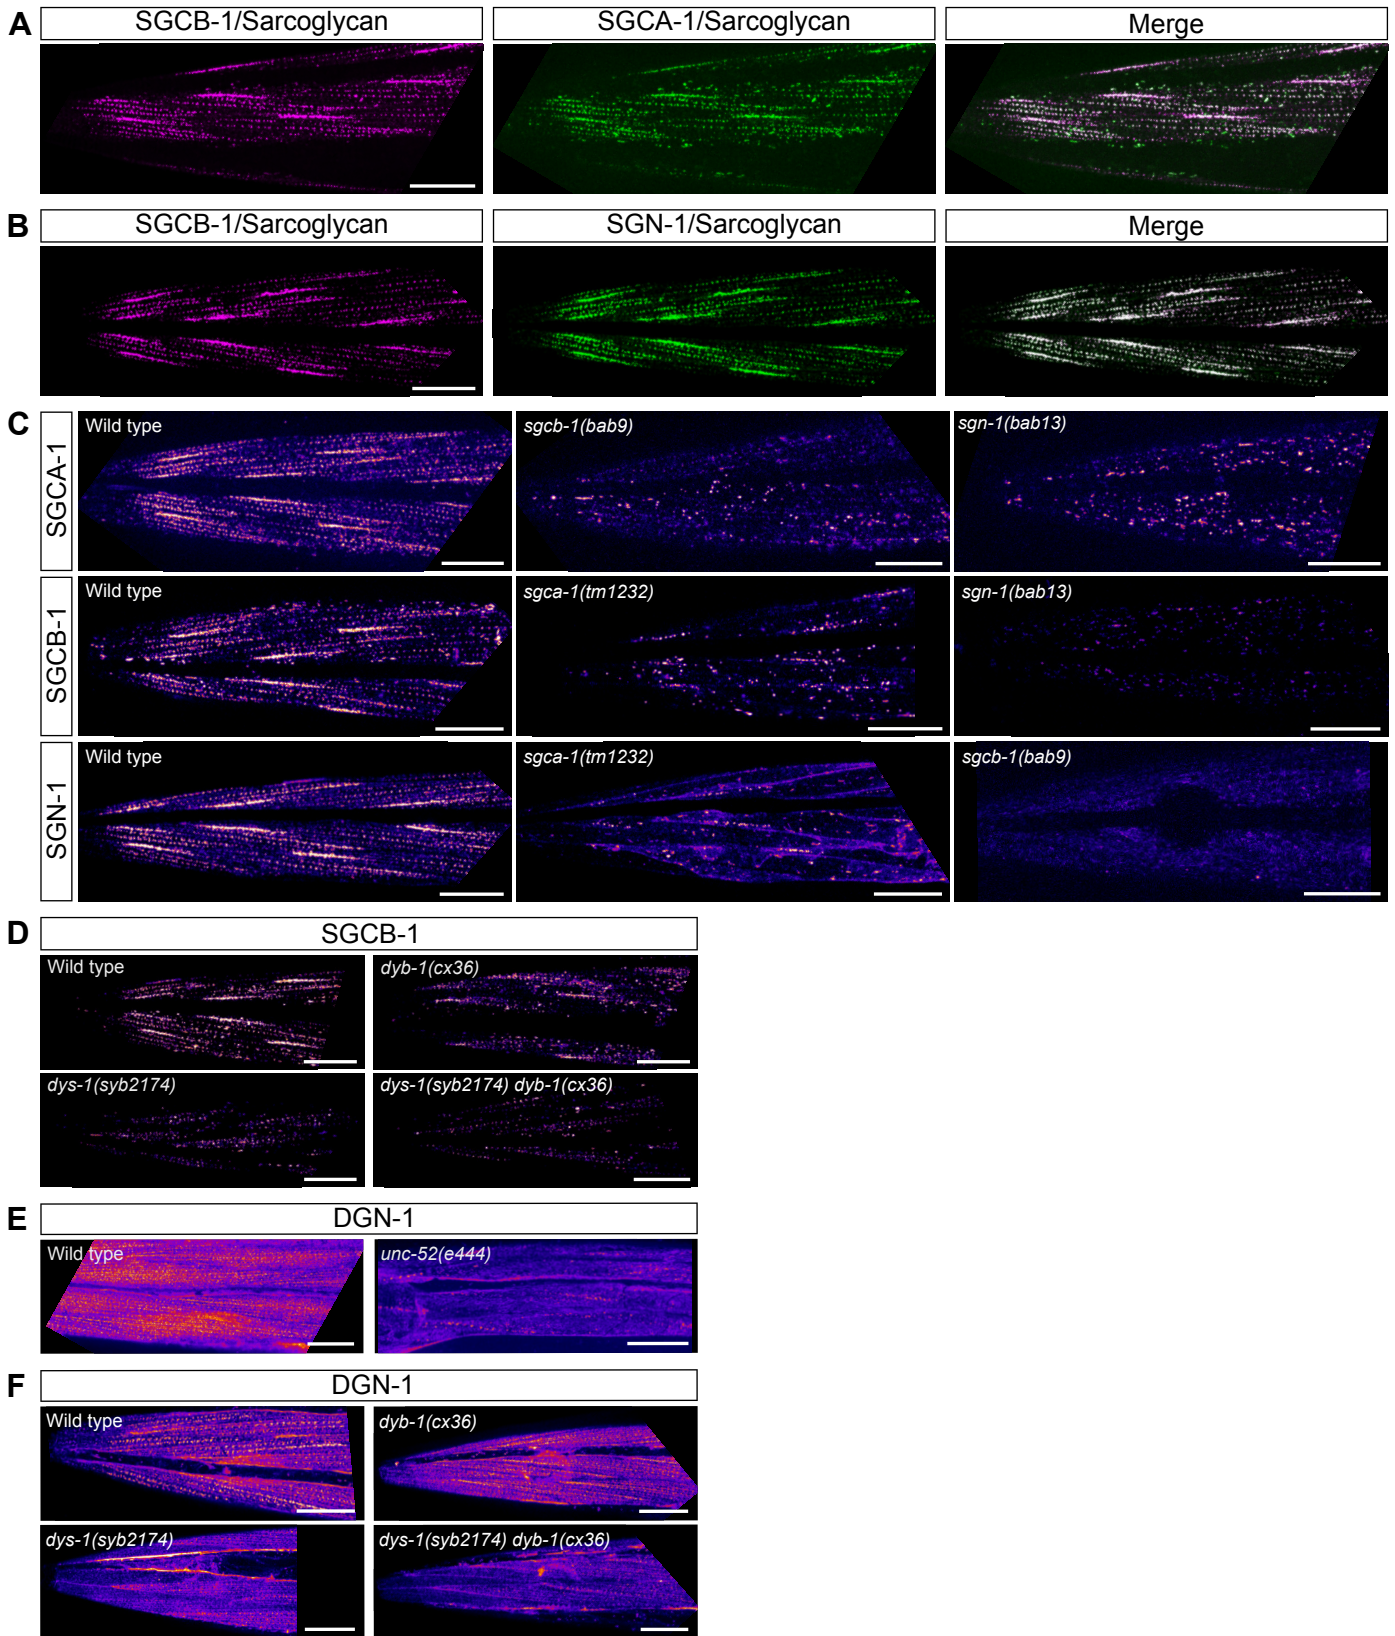

Figure S3

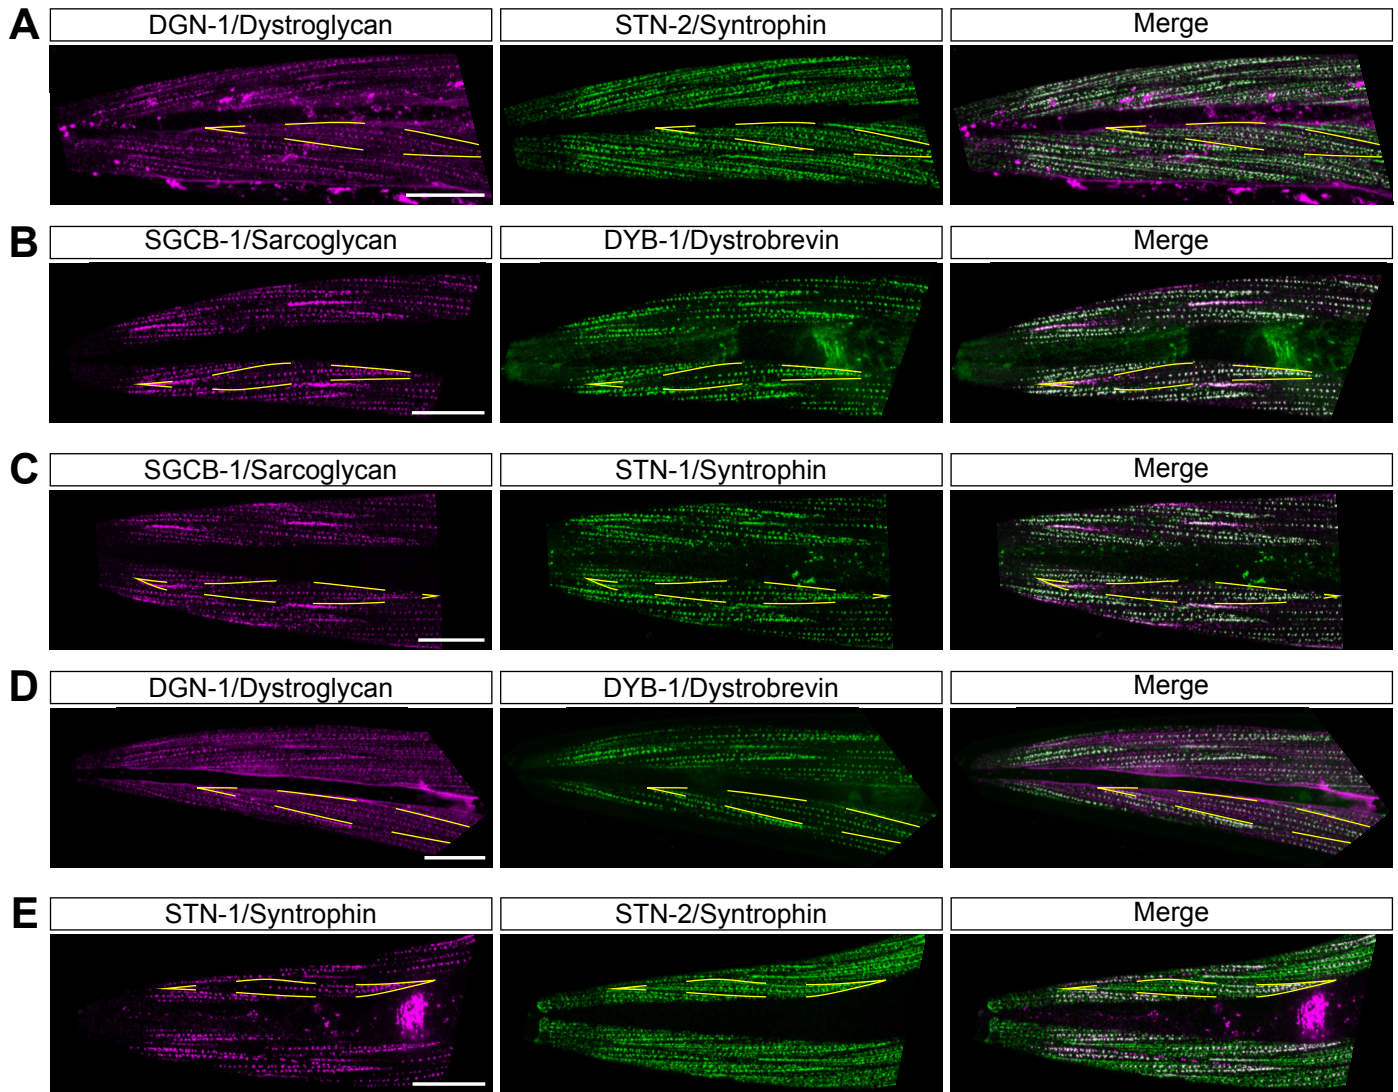



**Figure S4**

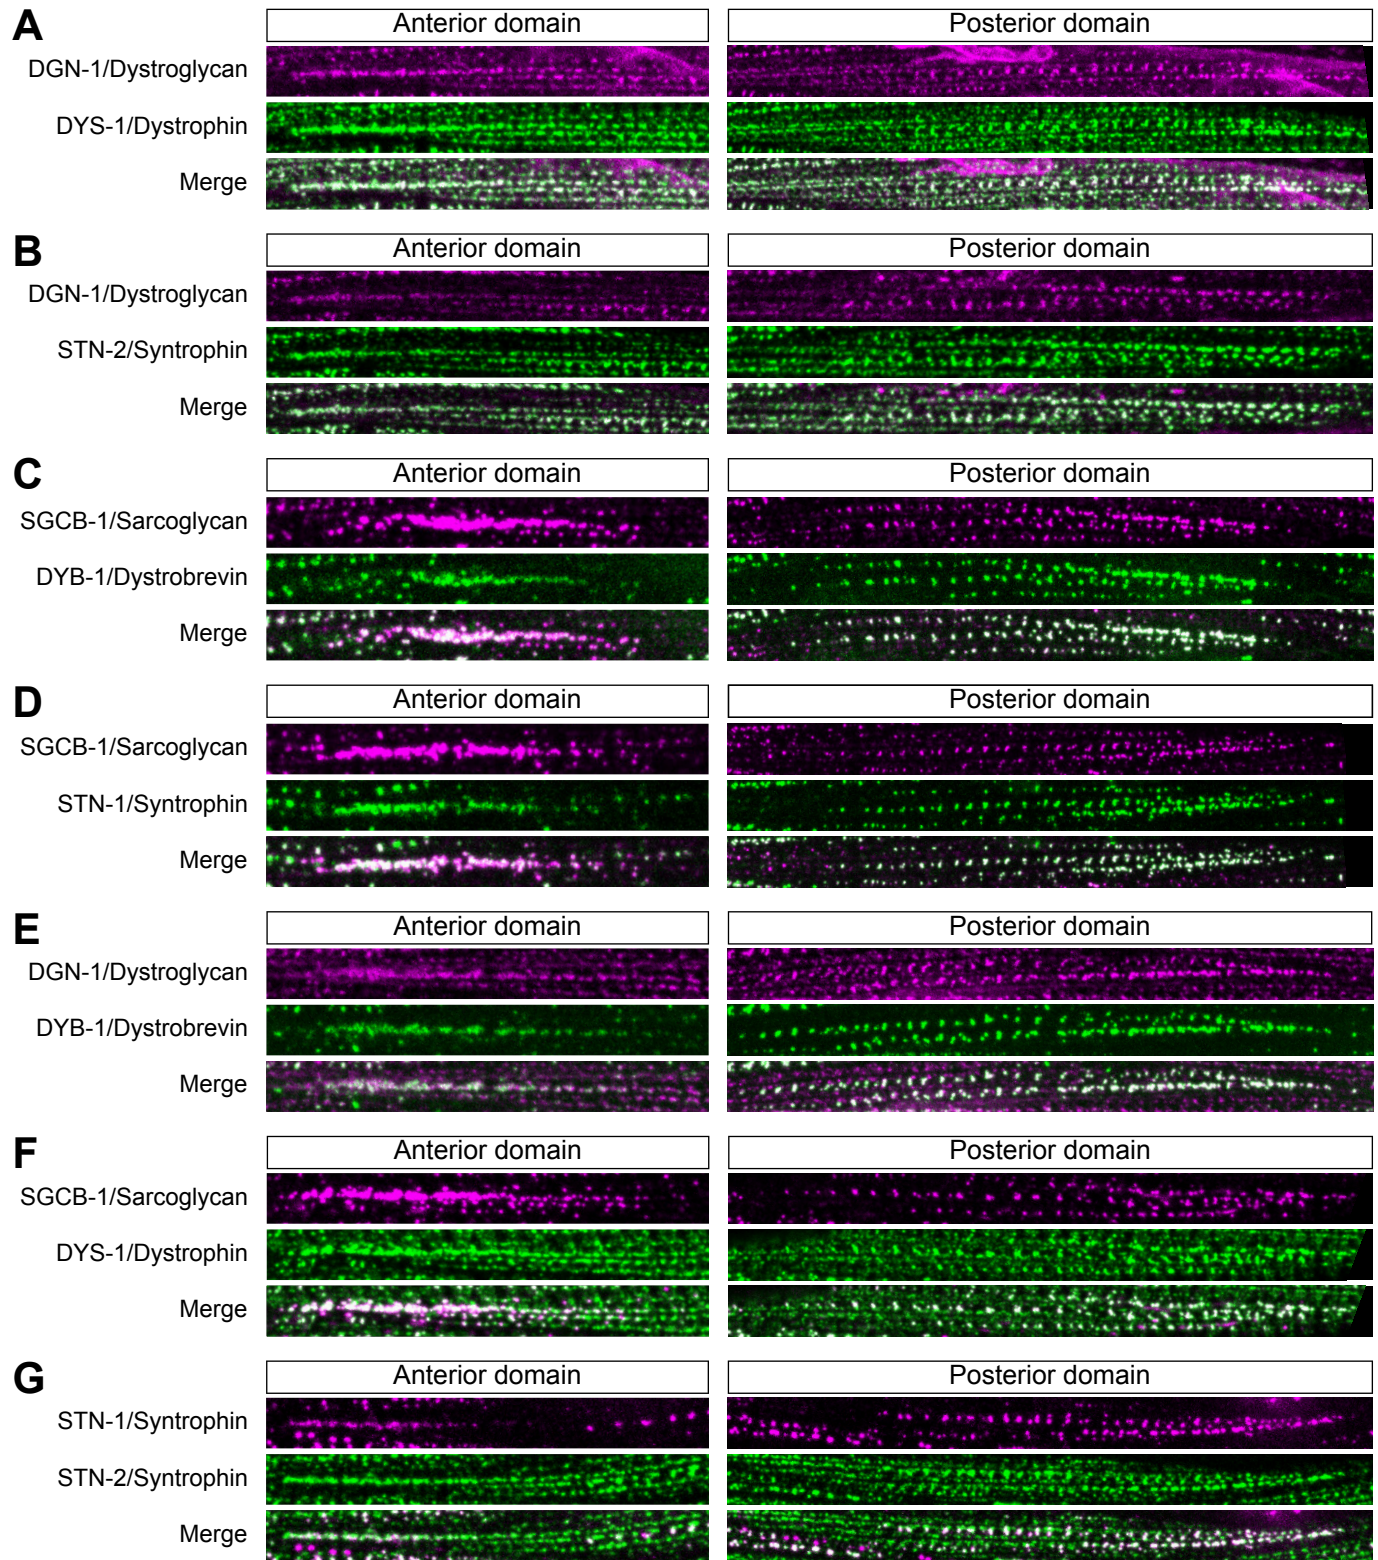

**Figure S5**

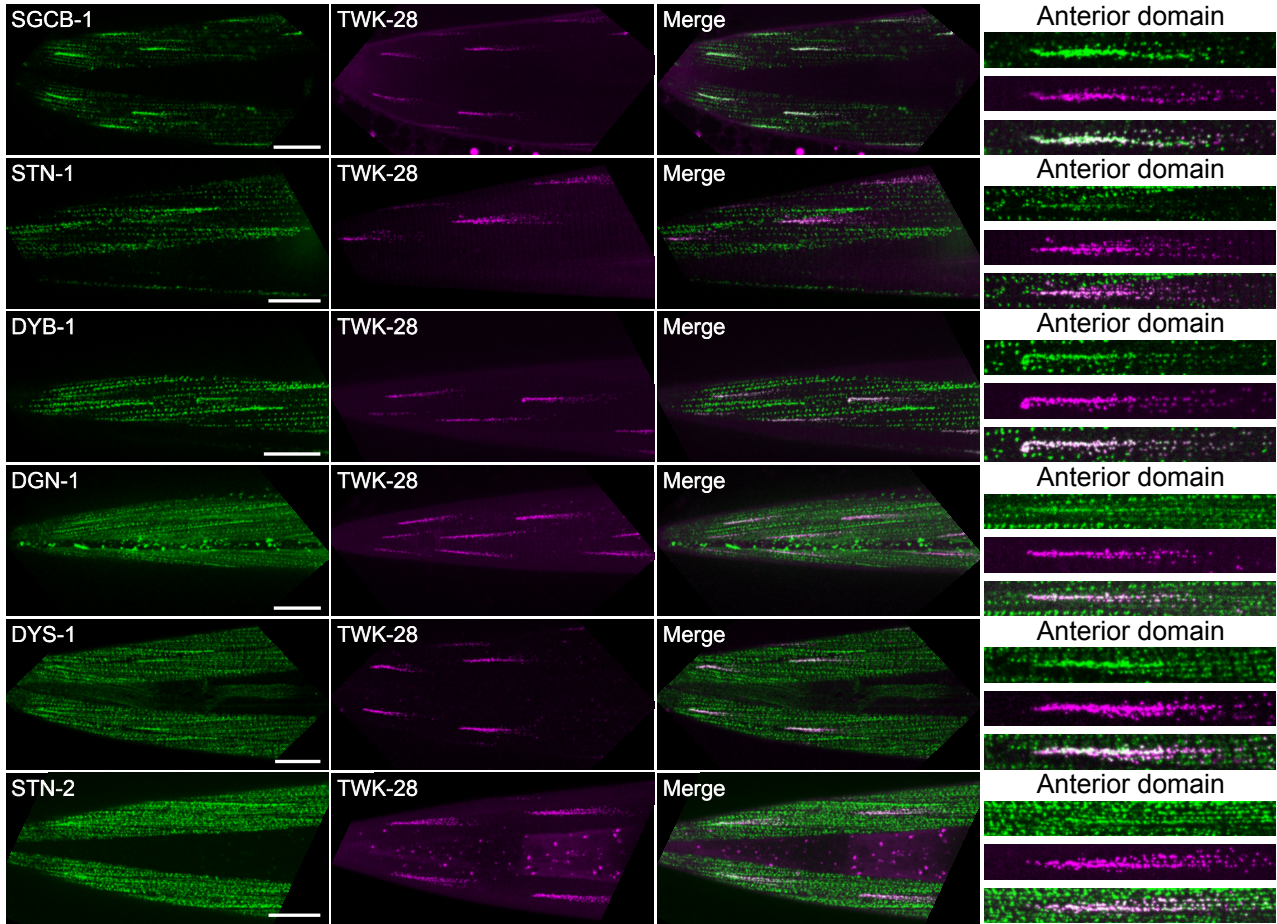



**Figure S6**

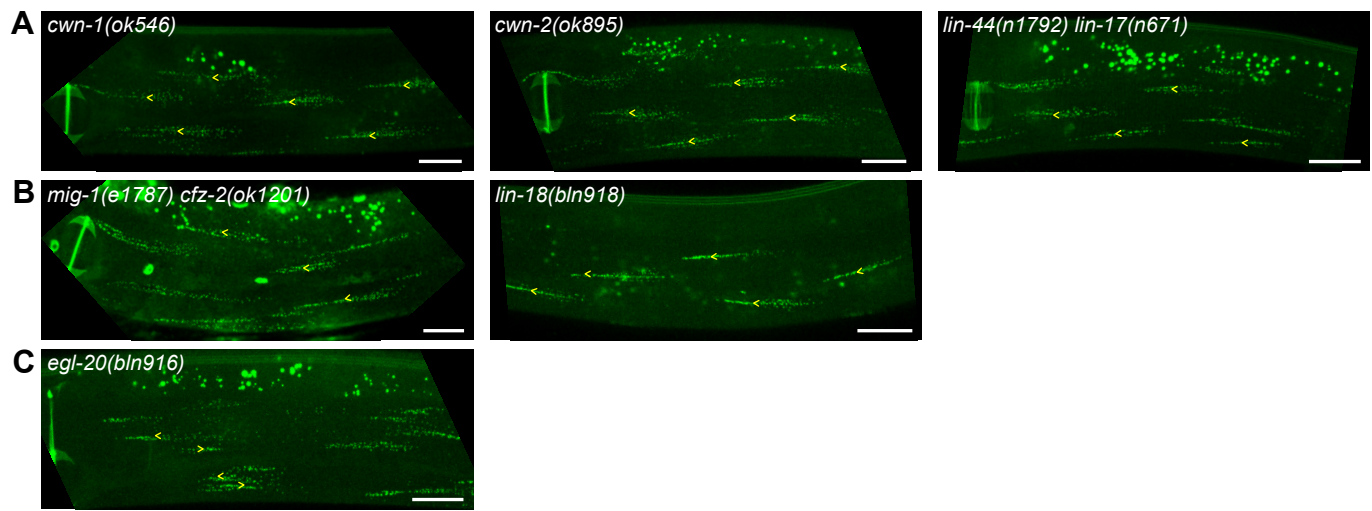

## Figure S7

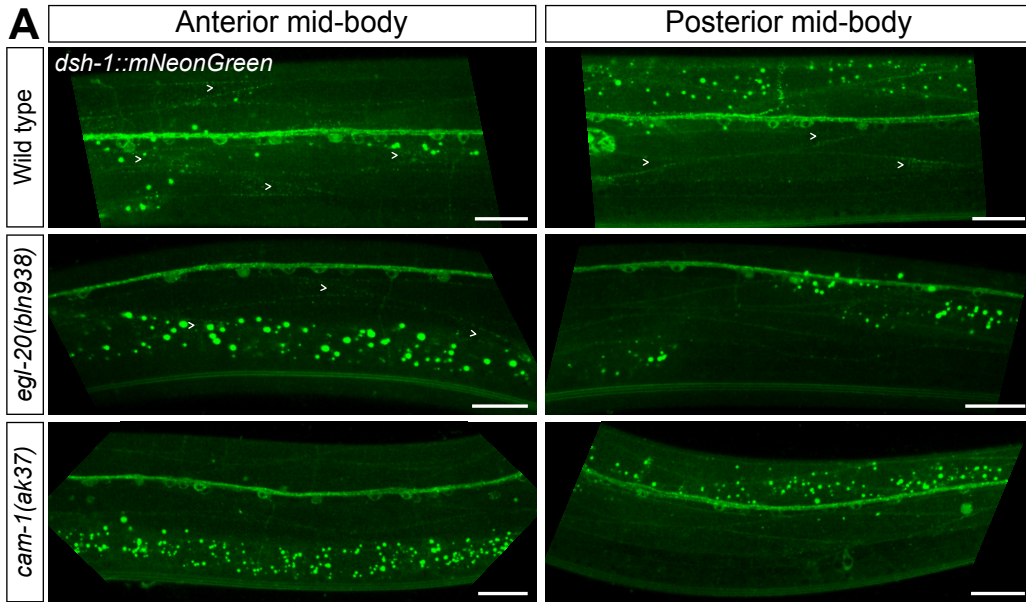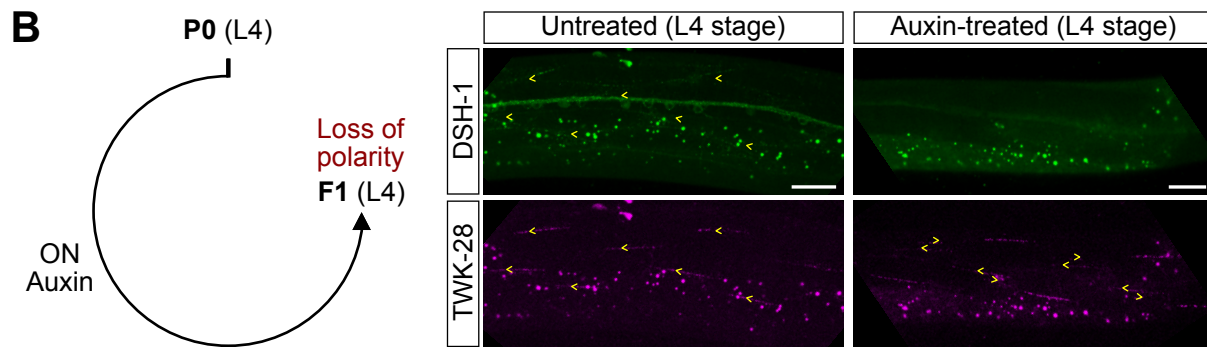

Source: https://www.biorxiv.org/content/10.1101/2023.03.28.534519v1.full.pdf
